# Supplementary material for: Gut-directed hypnotherapy versus standard medical treatment for nausea in children with functional nausea or functional dyspepsia: protocol of a multicentre randomised trial
Source: PubMed Central journal article supplement (PMC6500305; doi:10.1136/bmjopen-2018-024903), 2019-04-11
Supplement: bmjopen-2018-024903.draft_revisions.pdf [file bmjopen-2018-024903.draft_revisions.pdf]

# BMJ Open

BMJ Open is committed to open peer review. As part of this commitment we make the peer review history of every article we publish publicly available.

When an article is published we post the peer reviewers' comments and the authors' responses online. We also post the versions of the paper that were used during peer review. These are the versions that the peer review comments apply to.

The versions of the paper that follow are the versions that were submitted during the peer review process. They are not the versions of record or the final published versions. They should not be cited or distributed as the published version of this manuscript.

BMJ Open is an open access journal and the full, final, typeset and author-corrected version of record of the manuscript is available on our site with no access controls, subscription charges or pay-per-view fees (<http://bmjopen.bmj.com>).

If you have any questions on BMJ Open's open peer review process please email [editorial.bmjopen@bmj.com](mailto:editorial.bmjopen@bmj.com)

# BMJ Open

## Gut-Directed Hypnotherapy Versus Standard Medical Care for Nausea in Children with Functional Nausea or Functional Dyspepsia: Protocol of a Multi-Center Randomized Trial.

|                               |                                                                                                                                                                                                                                                                                                                                                                                                                                                                                                                                                                                                                                                                                                                                                                                                                                                                                                                                                                                                                                                                                                                                                                                |
|-------------------------------|--------------------------------------------------------------------------------------------------------------------------------------------------------------------------------------------------------------------------------------------------------------------------------------------------------------------------------------------------------------------------------------------------------------------------------------------------------------------------------------------------------------------------------------------------------------------------------------------------------------------------------------------------------------------------------------------------------------------------------------------------------------------------------------------------------------------------------------------------------------------------------------------------------------------------------------------------------------------------------------------------------------------------------------------------------------------------------------------------------------------------------------------------------------------------------|
| Journal:                      | <i>BMJ Open</i>                                                                                                                                                                                                                                                                                                                                                                                                                                                                                                                                                                                                                                                                                                                                                                                                                                                                                                                                                                                                                                                                                                                                                                |
| Manuscript ID                 | bmjopen-2018-024903                                                                                                                                                                                                                                                                                                                                                                                                                                                                                                                                                                                                                                                                                                                                                                                                                                                                                                                                                                                                                                                                                                                                                            |
| Article Type:                 | Protocol                                                                                                                                                                                                                                                                                                                                                                                                                                                                                                                                                                                                                                                                                                                                                                                                                                                                                                                                                                                                                                                                                                                                                                       |
| Date Submitted by the Author: | 27-Jun-2018                                                                                                                                                                                                                                                                                                                                                                                                                                                                                                                                                                                                                                                                                                                                                                                                                                                                                                                                                                                                                                                                                                                                                                    |
| Complete List of Authors:     | Browne, Pamela; Amsterdam UMC, Department of Pediatric Gastroenterology and Nutrition<br>den Hollander, Bibiche; Amsterdam UMC, Department of Pediatric Gastroenterology and Nutrition<br>Speksnijder, Esther; Amsterdam UMC, Department of Pediatric Gastroenterology and Nutrition<br>van Wering, Herbert; Amphia Ziekenhuis, Department of Pediatrics<br>Tjon a ten, Walther; Maxima Medical Center, Department of Pediatrics<br>George, Elvira; Northwest Clinics, Department of Pediatrics<br>Groeneweg, Michael; Maasstad Ziekenhuis, Department of Pediatrics<br>Bevers, Nanja; Zuyderland Medical Center, Department of Pediatrics<br>Wessels, Margreet; Rijnstate Hospital, Department of Pediatrics<br>van den Berg, Maartje; Haaglanden Medical Center, Department of Pediatrics<br>Goede, Joery; Spaarne Hospital, Department of Pediatrics<br>Teklenburg, Sarah; Isala Clinics, Department of Pediatrics<br>Frankenhuis, Carla; Amsterdam UMC, Department of Pediatric Gastroenterology and Nutrition<br>Benninga, Marc; Amsterdam UMC, Department of Pediatric Gastroenterology and Nutrition<br>Vlieger, Arine; St. Antonius Hospital, Department of Pediatrics |
| Keywords:                     | Hypnotherapy, Functional Nausea, Functional Dyspepsia, Children, Adolescents                                                                                                                                                                                                                                                                                                                                                                                                                                                                                                                                                                                                                                                                                                                                                                                                                                                                                                                                                                                                                                                                                                   |
|                               |                                                                                                                                                                                                                                                                                                                                                                                                                                                                                                                                                                                                                                                                                                                                                                                                                                                                                                                                                                                                                                                                                                                                                                                |

SCHOLARONE™  
Manuscripts

27 June 2018. v1.

1  
2  
3 **Gut-Directed Hypnotherapy Versus Standard Medical Care for Nausea in Children with**  
4 **Functional Nausea or Functional Dyspepsia: Protocol of a Multi-Center Randomized Trial.**  
5  
6  
7

8 **Author names and affiliations**

9 Pamela D. Browne<sup>1</sup>, Bibiche den Hollander<sup>1</sup>, Esther Speksnijder<sup>1</sup>, Herbert van Wering<sup>2</sup>,  
10 Walther Tjon A Ten<sup>3</sup>, Elvira K. George<sup>4</sup>, Michael Groeneweg<sup>5</sup>, Nanja Bevers<sup>6</sup>, Margreet  
11 Wessels<sup>7</sup>, Maartje van den Berg<sup>8</sup>, Joery Goede<sup>9</sup>, Sarah Teklenburg<sup>10</sup>, Carla Frankenhuis<sup>1</sup>,  
12 Marc A. Benninga<sup>1</sup>, Arine M. Vlieger<sup>11</sup>  
13  
14  
15  
16

17 **Corresponding author**

18 Pamela D. Browne; [P.D.Browne@amc.uva.nl](mailto:P.D.Browne@amc.uva.nl)

19 **Present/permanent address:** Department of Pediatric Gastroenterology and Nutrition,  
20 Emma Children's Hospital/Amsterdam UMC, Meibergdreef 9 (room C2-312), 1105 AZ  
21 Amsterdam, The Netherlands  
22  
23  
24  
25

- 26 1. Department of Pediatric Gastroenterology and Nutrition, Emma Children's  
27 Hospital/Amsterdam UMC, Amsterdam, Netherlands
  - 28 2. Department of Pediatrics, Amphia Hospital, Breda, the Netherlands
  - 29 3. Department of Pediatrics, Maxima Medical Center, Veldhoven, the Netherlands
  - 30 4. Department of Pediatrics, Northwest Clinics, Alkmaar, The Netherlands
  - 31 5. Department of Pediatrics, Maasstad Hospital, Rotterdam, The Netherlands
  - 32 6. Department of Pediatrics, Zuyderland Medical Center, Heerlen, The Netherlands
  - 33 7. Department of Pediatrics, Rijnstate Hospital, Arnhem, The Netherlands
  - 34 8. Department of Pediatrics, Haaglanden Medical Center, Den Haag, The Netherlands
  - 35 9. Department of Pediatrics, Spaarne Hospital, Hoofddorp, The Netherlands
  - 36 10. Department of Pediatrics, Isala Clinics, Zwolle, The Netherlands
  - 37 11. Department of Pediatrics, St. Antonius Hospital, Nieuwegein, The Netherlands
- 38  
39  
40  
41  
42  
43  
44  
45  
46  
47  
48  
49  
50  
51  
52  
53  
54  
55  
56  
57  
58  
59  
60

27 June 2018. v1.

## Abstract

*Introduction:* The treatment of chronic functional nausea or nausea due to functional dyspepsia in children is generally symptomatic. Moreover, these disorders pose a risk for worse psychosocial and health outcomes in children. Hypnotherapy, by its ability to positively influence gastrointestinal and psychosocial functioning, may be an effective treatment for chronic nausea.

*Methods and analysis:* To test efficacy, this multi-center, parallel, randomized controlled, open label trial evaluates whether gut-directed hypnotherapy (HT) is superior to standard medical care (SMT) for reducing nausea. The study will be conducted at eleven academic and non-academic hospitals across the Netherlands. A total of hundred children (8-18 years), fulfilling the Rome IV criteria for chronic idiopathic nausea or functional dyspepsia with prominent nausea, will be randomly allocated (1:1) to receive HT or SMT. Children allocated to the HT group will receive six sessions of HT during three months, while children allocated to the SMT group will receive six sessions of SMT + supportive therapy during the same period. The primary outcome will be the difference in the proportion of children with at least 50% reduction of nausea, compared to baseline at twelve months follow-up. Secondary outcomes include the changes in abdominal pain, dyspeptic symptoms, quality of life, anxiety, depression, school absences, parental absence of work, health-care costs, and adequate relief of symptoms, measured directly after treatment, six and twelve months follow-up. If HT proves effective for reducing nausea, it may become a new treatment strategy to treat children with chronic functional nausea or functional dyspepsia with prominent nausea.

*Ethics and dissemination:* Results of the study will be publically disclosed to the public, without any restrictions, in peer-reviewed journal and international conferences. The study is approved by the Medical Research Ethics Committees United (MEC-U) in the Netherlands.

**Registration details:** Dutch trial registration number is NTR5814. Registered on 7 June 2016.

<http://www.trialregister.nl/trialreg/admin/rctview.asp?TC=5814>

**Keywords:** Hypnotherapy, Functional Nausea, Functional Dyspepsia, Children, Adolescents

**Words:** 5972

27 June 2018. v1.

### Article summary (strengths and limitations)

- First study to investigate the effectiveness of hypnotherapy on symptoms of nausea in children and adolescents, diagnosed with chronic idiopathic nausea or functional dyspepsia.
- A multicenter study with eleven participating academic and non-academic hospitals recruiting 100 children and adolescents.
- Long-term study follow-up of one year.
- Due to the nature of hypnotherapy, children, parents, and health care providers are not blinded for the received treatments.

### 1. Introduction

Chronic idiopathic nausea (CIN) and functional dyspepsia (FD) affect approximately 0.5% and 4.5-7.6% children worldwide (Robin et al., 2017), respectively, and are associated with substantial physical and psychosocial distress, school absences and decreased social functioning (Kovacic, 2013; Perez, 2007; Russell, 2015). Moreover, it has a considerable negative financial impact on health care (Brook et al., 2010). According to the Rome IV criteria, when no evidence of organic disease is found, the disorders are considered functional. Children meet the Rome IV criteria for CIN when they suffer from chronic nausea without abdominal pain, when symptoms are not related to meals, and not consistently associated with vomiting. Children are diagnosed with FD when they have chronic symptoms of epigastric pain/burning, symptoms of postprandial fullness, and/or early satiation (Hyams et al., 2016).

The treatment of CIN and FD with prominent nausea in pediatric patients is mostly symptomatic and not well defined. Most clinicians individualize the patient's medical treatment, including prokinetics, anti-emetics, antacids, and herbal products, according to their symptoms and associated comorbidities (Perez et al., 2007; Russell et al., 2015). The major disadvantage of this approach is that this treatment is symptomatic, and thus drugs often need to be used as long as patients suffer from nausea, which may take years (Madani, 2016; Rodriguez, 2013). Hence, there is a need for additional effective treatments for nausea in children with CIN or FD.

Several pathophysiologic mechanisms have been proposed to play a role in the etiology of CIN and FD, including delayed gastric emptying, impaired gastric motility and/or abnormal central nervous system processing of gastric stimuli through the gut-brain axis

27 June 2018. v1.

1  
2  
3 (Perez, 2007). Additionally, there are indications that psychological factors, including anxiety  
4 and stress, may increase the severity of nausea through the gut-brain axis (Kellow et al.,  
5 2006; Oudenhove et al., 2008).  
6  
7

8 Gut-directed hypnotherapy (HT) may have the potential to reduce symptoms of  
9 nausea in children with CIN or FD. HT is a form of therapy in which a therapist, by using  
10 suggestions, can induce a hypnotic state in an individual to positively modify physiological,  
11 cognitive, and affective processes, as well as behavior in that individual (Häuser, 2016). It has  
12 been shown to be very effective in the treatment of adults and children with functional  
13 abdominal pain (Miller et al., 2015; Vlieger, 2007) and children with chemotherapy-induced  
14 nausea and vomiting (Richardson et al., 2007). Therefore we hypothesize that HT, by its  
15 ability to influence gut motility (Whorwell, 1992), psychological well-being (Gonsalkorale,  
16 2002) and visceral hypersensitivity (Lea et al., 2003; Lowén et al., 2013; Prior, 1990), might  
17 alleviate symptoms of nausea in children with CIN or FD as well. To date, however, no  
18 studies have examined the potential effect of HT in children with CIN or FD.  
19  
20  
21  
22  
23  
24  
25  
26

27 The main goal of this multi-center randomized controlled trial is to evaluate the  
28 effectiveness of HT in reducing symptoms of nausea in children with CIN or FD. Six sessions  
29 of gut-direct HT will be compared with six sessions of SMT plus supportive therapy in 100  
30 children with CIN or FD between 8 and 18 years. Additionally, we will investigate the  
31 potential influence on abdominal pain, dyspeptic symptoms, quality of life, anxiety,  
32 depression, school absences, parental absence of work and health-care costs. We expect  
33 that HT will be more effective in reducing symptoms of nausea than standard medical care.  
34 Furthermore, we expect that children receiving hypnotherapy will report more relief of  
35 symptoms (e.g. less abdominal pain, less dyspeptic symptoms), better quality of life, less  
36 symptoms of anxiety and depression, less absence from school, compared to children  
37 receiving standard medical care. We also expect that parents of children in the  
38 hypnotherapy group will report less parental absences from work and lower health care  
39 costs, compared the medical care group.  
40  
41  
42  
43  
44  
45  
46  
47  
48  
49  
50  
51  
52  
53  
54  
55  
56  
57  
58  
59  
60

27 June 2018. v1.

## 2. Methods

### 2.1 Trial design

The present study in children and adolescents is a multi-center randomized controlled trial (RCT). Hundred children between ages 8 and 18 years with symptoms of nausea and fulfilling the Rome IV criteria for CIN or FD, diagnosed by their pediatrician, will be enrolled in the study. After randomization, children will receive either 6 sessions of gut-directed HT during 3 months by a qualified hypnotherapist, or 6 sessions of SMT plus supportive therapy from their pediatrician during 3 months (see Figure 1). Detailed information on the HT and SMT interventions can be found under the section '2.5. Intervention'. The additional file 1 presents the Standard Protocol Items: Recommendations for Interventional Trials (SPIRIT) checklist (see additional File 1).

### 2.2. Patient and Public Involvement

Patients and the public were not involved in the design of the RCT.

#### X

**Figure 1.** Standard Protocol Items: Recommendations for Interventional Trials (SPIRIT) Figure displaying the trial design and the outcome measurements. After screening for eligibility (t-1), children and parents sign the informed consent form and fill in the baseline questionnaire (t0). Children are then randomized in the hypnotherapy (HT) or standard medical care (SMT) group. Assessments take place before the start of treatment (baseline; t0), 6 weeks after the start of treatment (t1), 3 months after the start of treatment (t2), 6 months follow-up (t3) and 12 months follow-up (t4).

### 2.3 Recruitment

#### 2.3.1 Recruitment procedures

Children and adolescents will be recruited in outpatient pediatric clinics of 1 academic and 10 non-academic hospitals in the Netherlands: Academic Medical Center (Amsterdam), Amphia Hospital (Breda), Maxima Medical Center (Veldhoven), Northwest Clinics (Alkmaar), Maastad Hospital (Rotterdam), Zuyderland Medical Center (Heerlen), Rijnstate Hospital, (Arnhem), Haaglanden Medical Center (Den Haag), Spaarne Hospital (Hoofddorp), Isala Clinics (Zwolle) and St. Antonius Hospital (Nieuwegein). These centers are located in both urban and rural areas throughout the Netherlands, serving an ethnically diverse pediatric population.

27 June 2018. v1.

### 2.3.2. Participant screening

All children with symptoms of nausea and fulfilling the Rome IV criteria for CIN or FD, will undergo blood laboratory testing before inclusion, including complete blood cell count, C-reactive protein, liver function tests, creatinine, total bilirubin, and for celiac screening, amylase anti-transglutaminase antibodies and IgA testing. Additionally, urinalysis and stool analysis for parasites (*Giardia Lamblia*, *Entamoeba Histolytica*) and *Helicobacter pylori* antigens will be performed. The need for additional diagnostic testing, for example endoscopy to rule out eosinophilic esophagitis or 24h pH, will be left to the discretion of the treating pediatrician or pediatric gastroenterologist. The flow of the study protocol is presented in Figure 2.

## X

**Figure 2.** The Consolidated Standards of Reporting Trials (CONSORT) flow diagram indicating the number of participants throughout the study. After eligibility screening, children are randomized in either the hypnotherapy (HT) or standard medical care (SMT) group. Follow-up measurements take place at 6 weeks after the start of treatment (t1), 3 months after the start of treatment (t2), and 6 months follow-up (t3) and 12 months follow-up (t4).

## 2.4. Criteria

### 2.4.1. Inclusion criteria

A total sample of 100 children and adolescents with CIN or FD with symptoms of nausea will be enrolled in the study. Children and adolescents can participate in this study if they meet the following inclusion criteria:

- Age 8 to 18 years at inclusion of the study
- Diagnosis of CIN or FD, with symptoms of nausea, according to Rome IV criteria (Hyams et al., 2016)
- Sufficient knowledge of the Dutch language

### 2.4.2. Exclusion criteria

Children will not be enrolled in the study if they meet the following exclusion criteria:

- Concomitant organic gastrointestinal disease
- Simultaneous treatment by another health care professional for symptoms of nausea
- Previously received hypnotherapy
- Intellectual disability



27 June 2018. v1.

## 2.5. Randomization, blinding, and treatment allocation

After obtaining informed consent, children are randomly allocated, by the treating pediatricians, to one of the two treatment arms: HT, given by a qualified therapist, or SMT, meaning treatment by the child's pediatrician. A computerized random-number generator will be used to randomly allocate children on a 1:1 basis with varying block sized of 2, 4 and 6. To ensure allocation concealment, central randomization will be applied and the random allocation sequence remains concealed from pediatricians enrolling children into the study. Due to the nature of HT, it is not possible to blind the participating children and health care professionals involved in the treatment of the participants.

## 2.6. Intervention

### 2.6.1. Hypnotherapy

Individual HT consist of 6 sessions of 50-60 minutes, given over a period of 3 months by a qualified hypnotherapist. Twelve hypnotherapist affiliated to the recruiting hospitals will offer the HT to children. All hypnotherapists have years of experience in performing HT in children. The hypnotherapists will use an adapted version of our previously used HT protocol (Rutten et al., 2017; Vlieger et al., 2007). The HT protocol contains exercises focusing on normalization of the gut motility, stress reduction and ego strengthening. The hypnotherapists will be instructed to use the same scripts, but are allowed to adapt the content to the child's needs. The same protocol is used for children of all ages. However, the language used will be adjusted to the child's developmental age.

In the first session, an introduction to HT will be given to the child and parents, including an explanation of what HT is and how it may help in reducing symptoms of nausea.

Furthermore, the hypnotherapist will take a full history and children and parents are instructed to not talk about the nausea during the treatment period. The hypnotherapist will then start with a breathing exercise and introduce a progressive relaxation, in which children imagine floating on a big cloud. Positive suggestions to increase the child's belly comfort will also be provided. For instance, the child will be instructed to make hands warm and place both hands on the belly, imagining warmth spreading through their abdomen, and especially the stomach.

In the second session, the therapist will repeat the exercise on progressive relaxation.

Additionally, the therapist will introduce an exercise focusing on reduction of anxiety and

27 June 2018. v1.

stress, which is called 'the favorite place exercise'.

The third session focuses on ego strengthening and a new exercise will be introduced: 'the rainbow planet exercise' for children attending primary school, and 'the air balloon exercise' for children in secondary school. In the first exercise, children choose a personal need from a rainbow that contains different needs, for example a healthy stomach, courage, tranquility, or confidence.

In the fourth session, children are encouraged to release stress during the 'the beach without worries exercise' and additional ego strengthening suggestions are made.

The fifth session focuses on reduction of anxiety, stress and ego strengthening, as well as improved functioning of the digestive system. For the digestive system, children visualize a well working digestive system with food sliding through the stomach and bowel in a comfortable way.

In the sixth session, the previous sessions will be evaluated, remaining gastro-intestinal problems may be addressed and preceding exercises may be repeated, if requested by children. If no improvement has taken place, an exercise will be introduced in which the child is instructed to look inside the stomach to see 'what the stomach needs'.

After the first session, all children will receive a CD containing standard scripts of the exercises used during the sessions. The hypnotherapist will advise children to self-practice these exercises on a daily basis. Additionally, the therapist will encourage children to practice breathing exercises a few time a day.

#### *2.6.2. Standard medical care + supportive therapy*

In the SMT group, children will visit their treating pediatrician 6 times over a 3-month period. All pediatricians will be instructed to use the same protocol for treating symptoms of nausea. The protocol consists of a stepwise approach. In the first step, children and parents will be educated about CIN and FD, reassured that there is no structural organic underlying disease present, and dietary and lifestyle advices will be provided. Children will be advised to adhere to national practical guidelines for healthy eating by the Netherlands Nutrition Centre. Children will be recommended to avoid products containing caffeine, strong spices, citrus fruits, onions, fatty foods, and if applicable, to stop smoking. Additionally, the pediatrician will explore, together with children and parents, possible connections between stressful moments, emotional problems and complaints of nausea. If connections are

27 June 2018. v1.

1  
2  
3 present, the pediatrician will encourage children and parents to improve coping strategies to  
4 effectively manage stress, to reduce external stressors, and to ensure an optimal  
5 environment with sufficient relaxation. Children will also be encouraged to continue their  
6 normal daily and sport activities and to go to school, to prevent or decrease avoidance  
7 behavior.  
8

9  
10  
11 In case this does not result in adequate relief of symptoms, the pediatrician continues with  
12 the second step. In the second step, proton pump inhibitors (PPI) in combination with  
13 domperidone will be prescribed. If this treatment is not effective in reducing symptoms the  
14 pediatrician continues with the third step, which includes the prescription of ondansetron  
15 and (dis)continuation of PPIs. If again no adequate improvement occurs, in the fourth step,  
16 Iberogast will be started for children >12 years. If children do not respond to Iberogast (>12  
17 years) or ondansetron (<12 years), the pediatrician will continue with the fifth step and  
18 prescribe erythromycin. Finally, if previous treatment did not prove to be successful in  
19 reducing symptoms, cyproheptadine will be prescribed.  
20

21  
22 The pediatrician will evaluate each step after two to four weeks. All dosages, except for  
23 Iberogast, will be prescribed according to [www.kinderformularium.nl](http://www.kinderformularium.nl) (Dutch medical  
24 guideline for pediatricians).  
25

26  
27 In addition to the medical treatment, children will receive 6 half hour sessions of supportive  
28 therapy given by the treating pediatrician. In these sessions, the symptom progression will  
29 be discussed and patient education will be provided. Moreover, exploration of potential  
30 contributing triggers (i.e. dietary product, emotional problems and stressful events) will be  
31 evaluated together with children and parents. Supportive therapy is added to correct for the  
32 patient-therapist time in the HT group.  
33  
34  
35  
36  
37  
38  
39  
40  
41  
42  
43

#### 44 *2.6.3. Co-interventions*

45 After 6 sessions of HT, children visit their pediatrician to evaluate the effects of HT and, if  
46 considered necessary, to receive additional medical care.  
47  
48  
49

### 50 **2.7. Outcomes**

#### 51 *2.7.1. Primary outcome*

52 The primary outcome of the RCT is the proportion of patients with at least 50% reduction of  
53 their symptoms of nausea compare to baseline at 12 months follow-up. Children and  
54  
55  
56  
57  
58  
59

27 June 2018. v1.

adolescents report symptoms of nausea at home by using the 7-day diary. To promote retention and complete follow-up, children and parents will be reminded on regular basis, via email and phone calls, to fill in the 7-day diary and other questionnaires.

### *7-day diary*

The 7-day diary is used by children and adolescents to score the severity, incidence and frequency of symptoms of nausea, every day during 7 consecutive days (Rutten et al., 2014; Vlieger et al., 2007, 2012).

The *severity* of nausea is assessed by the 'nausea face' analog scale, a validated tool in the pediatric population (Baxter, 2011). Children rate their degree of nausea on a day using 6-faces: face 0 indicates no nausea and face 6 indicates nausea as bad as it can be imaged. Scores on the 'nausea face' scale are transported to a daily 0-10 score. Face 0, no nausea, is scored as 0, face 1 is scored as 2, face 2 is scored as 4, face 3 is scored as 6, face 4 is scored as 8 and face 5 is scored as 10 (Baxter et al., 2011). The 'severity of nausea' (SON) score is calculated by summing up the scores of seven days, giving a maximum of score of 70 (Rutten et al., 2017; Rutten et al., 2014; Vlieger et al., 2007, 2012).

The *incidence* nausea is assessed using the 'nausea incidence' scale (NIS), adapted from the 5-point dyspepsia Likert scale (Canan, 2011; De Luca et al., 2004). It measures the incidence of symptoms during a day, where score 0 for no nausea, score 1 for 1-2 times a day, score 2 for 3-5 times a day, score 3 for intermittent complaints and score 4 for complaints were always present. The total sum of the scores of seven days indicates the severity of the nausea during a week, as experienced by the child. The maximum total score is 28 (Rutten et al., 2017; Rutten et al., 2014; Vlieger et al., 2007, 2012).

The *frequency* of symptoms of nausea is recorded in minutes/hours per day and is scored by children as 0 when there was no nausea, 1 if children had <10 minutes of nausea, 2 for 10-30 minutes of nausea, 3 for 30 minutes-2 hours of nausea, 4 for 2-4 hours of nausea and 5 if the nausea lasts >4 hours a day. The 'nausea frequency score' (NFS) is calculated by summing the scores of the seven days, with a maximum of 35 (Rutten et al., 2014; Vlieger et al., 2007, 2012).

### *2.7.2. Secondary outcomes*

In addition to the primary outcomes, the present study investigates secondary outcomes,

27 June 2018. v1.

1  
2  
3 including abdominal pain, dyspeptic symptoms, health related quality of life, anxiety,  
4 depression, school absences, parental absence of work and health-care costs. Secondary  
5 outcomes are measured at 6 weeks and 3 months after treatment, and at 6 and 12 months  
6 follow-up after the end of treatment (Figure 1).  
7  
8  
9

### 10 11 *Abdominal pain*

12  
13 A 7-day diary is used to assess the severity and frequency of abdominal pain, every day  
14 during 7 consecutive days. It comprises of two subscales: the abdominal pain intensity  
15 subscale (APIS) and abdominal pain frequency subscale (APFS). The APIS will be scored using  
16 an affective facial scale ranging with face 0 indicating 'no pain at all' to face 5 indicating 'the  
17 most severe pain'. No abdominal pain is scored as 0, faces 1 - 2 are scored as 1, faces 3 - 4  
18 are scored as 2 and face 5 is scored as 3. The scores of seven days are summed up, with a  
19 maximum score of 21 (Rutten et al., 2017; Rutten et al., 2014; Vlieger et al., 2007, 2012). The  
20 APFS is recorded in minutes/hours of abdominal pain per day, with score 0 indicating no  
21 pain, score 1 if children had <10 minutes of pain, 2 for 10-30 minutes of pain, 3 for 30  
22 minutes-2 hours of pain, 4 for 2-4 hours of pain and 5 >4 hours of pain. The scores the APFS  
23 are summed up, giving a pain frequency score of maximum 35 (Rutten et al., 2017; Rutten et  
24 al., 2014; Vlieger et al., 2007, 2012).  
25  
26  
27  
28  
29  
30  
31  
32  
33

### 34 *Dyspeptic symptoms*

35  
36 Severity and incidence of dyspeptic symptoms is measured using the 5-point dyspepsia  
37 Likert scale, previously used in the pediatric population (Canan, 2011; De Luca, 2004). The  
38 dyspepsia Likert scale consists of 8 gastrointestinal dyspeptic symptoms: epigastric pain,  
39 upper abdominal discomfort, retrosternal pyrosis, sour-bitter taste, halitosis, belching,  
40 nausea, and early satiety. Children score the *severity* of each symptoms during the previous  
41 two weeks on a 5-point Likert scale: score 1 'no complaints at all', score 2 'little complaints',  
42 score 3 'moderate complaints', score 4 'quite a lot of complaints' and 5 'serious complaints'  
43 (Canan et al., 2011). A higher sum score indicates more severe dyspeptic complaints (SDC  
44 score), with a maximum of 40.  
45  
46  
47  
48  
49  
50

51 Children report on the *incidence* of each of the symptoms during the previous two weeks by  
52 scoring: 1 'no complaints', 2 '1-2 times a week', 3 '3-5 times a week', 4 'intermittent  
53 complaints' and 5 'complains were always present' (Canan et al., 2011). The dyspepsia  
54 severity score (DSS) is calculated by summing up the scores, giving a maximum value of 40.  
55  
56  
57  
58  
59  
60

27 June 2018. v1.

### *Health related quality of life*

The KIDSCREEN-52 questionnaire measures health related quality of life (QoL) in children and adolescents. The questionnaire has been shown a valid tool in the Dutch pediatric population (Ravens-Sieberer et al., 2008; The Kidscreen Group Europe, 2006). The KIDSCREEN-52 consists of items on ten dimensions related to QoL on a 5-point Likert scale: moods and emotions, self-perception, relations with parents and home life, autonomy, physical well-being, psychological well-being, school environment, social support and peers, social acceptance (bullying) and financial resources. For each individual dimension, Rasch scores are computed from the individual items. These are then transformed into T-values: higher T-values indicate a better health related QoL and well-being.

### *Anxiety and depression*

Anxiety and depression are evaluated using the Revised Anxiety and Depression Scale-short version (RCADS-25). This questionnaire has been previously validated in the Dutch pediatric population (Muris, 2002). The RCADS-25 consists of five subscales measuring symptoms of generalized anxiety disorders, separation anxiety disorder, social phobia, panic disorder and major depressive disorder. Each subscale contains five items and scales range from 0 (never) to 3 (always). The total score on anxiety or depression is the sum of the items measuring symptoms of anxiety and depressive symptoms, respectively. Higher scores indicate more symptoms of anxiety or depression.

### *Cost effectiveness/cost utility*

The Health Utility Index Mark 3 (HUI) will be used in the cost-utility and cost-effectiveness analysis. The HUI-3 is a multi-attribute utility measure of health status in children as reported by parents. Proxy measurements of parents for health status of children are justifiable, as some children may be too young to provide reliable and valid information about their own health status (Eiser & Morse, 2001; Feeny et al., 2002; Tarride et al., 2010). The questionnaire consists of eight dimensions of health status: vision, hearing, speech, ambulation, dexterity, emotion, cognition, and pain with 5 or 6 levels per attribute, which scales varying from highly impaired to normal. Health utilities of 1 indicate perfect health, whereas 0 indicates death. The Quality adjusted life years (QALY) will be calculated by multiplying the sum of the utility of health states by the time in between measurements.

### *Work absenteeism by parents and school absenteeism by children*

An adapted version of the Dutch Health and Labor Questionnaire (HLQ) will be used to

27 June 2018. v1.

1  
2  
3 measure work absenteeism by parents, school absenteeism by children, and indirect costs of  
4 health care utilization (Van Roijen, 1996). This adapted version contains three items. Parents  
5 indicate whether their child has been absent from school due to complaints of nausea, and if  
6 yes, the amount of hours per week. For work absenteeism by parents, parents indicate the  
7 number of hours they worked less on average because of their child's symptoms of nausea.  
8 For the indirect costs of health care utilization, parents indicate additional costs they had  
9 due to symptoms of nausea of their child over the past four weeks.  
10  
11  
12  
13

### 14 *Somatization*

15  
16 The Children's Somatization Inventory (CSI) measures the extent to which children and  
17 adolescents experience somatic symptoms. The questionnaire has been shown a valid and  
18 reliable self-report instrument in the pediatric population (Meesters, 2003). The CSI consists  
19 of 35 items and on a 5-point Likert scale (0 = not at all to 4 = a whole lot) and children rate  
20 the extent to which they experienced somatic symptoms in the previous two weeks. The  
21 total score is calculated by summing up the 35 items, with higher scores indicating higher  
22 intensity of somatic complaints experienced by the child.  
23  
24  
25  
26  
27

28 In order to calculate a separate CSI-score for non-gastrointestinal (GI) symptoms, 7 items on  
29 GI-symptoms (nausea, constipation, diarrhea, epigastric and abdominal pain, vomiting and  
30 bloating) are left out. The total score of somatic symptoms without GI-symptoms is  
31 calculated by summing up the scores of non-GI symptoms, with higher scores reflecting  
32 higher intensity of non-GI somatic complaints.  
33  
34  
35  
36

### 37 *Adequate relief*

38  
39 Parents and children will be asked whether adequate relief of symptoms of nausea has  
40 occurred, using a dichotomous scale (yes/no). Adequate relief has been previously used as  
41 an endpoint in clinical trials assessing hypnotherapy in children and adolescents (Rutten et  
42 al., 2017) and has been shown a valid outcome measure for functional gastrointestinal  
43 disorders (Mangel et al., 1998).  
44  
45  
46  
47  
48

## 49 **2.8. Sample size calculation**

50  
51 The primary outcome of the RCT is the proportion of patients with at least 50% reduction of  
52 their symptoms of nausea compare to baseline at 12 months follow-up. Based on our pilot  
53 study (Vlieger, A. M. "A pilot-study of hypnotherapy as a treatment for functional nausea in  
54 children") and the success percentages in studies using hypnotherapy in adults with  
55  
56  
57  
58  
59  
60

27 June 2018. v1.

1  
2  
3 functional dyspepsia (Calvert, 2002) and in pediatric cancer patients (Richardson et al.,  
4 2007), we expect that 80% of the children in the hypnotherapy group will have >50%  
5 reduction of their symptoms of nausea after one year. In the standard medical care group,  
6 we anticipate that 50% of the children will have >50% reduction of their symptoms of  
7 nausea after one year. Based on these expected proportions, 45 children per group will be  
8 needed to achieve a power of 80% with a one-sided significance level of 5%. Accounting for  
9 a 10% dropout, 100 children will be included in this study. If a child is prematurely  
10 withdrawn from the study, he/she will not be replaced; data will be analyzed according to  
11 the intention to treat analysis.  
12  
13  
14  
15  
16  
17  
18

## 19 **2.9. Statistical analysis**

### 20 *2.9.1. Primary outcome*

21 Outcomes will be analyzed according to the intention to treat (ITT) analysis. For the primary  
22 outcome, the Chi-square test will be used to compare the proportions of patients with >50%  
23 reduction of symptoms of nausea (i.e. severity, incidence and frequency of nausea) after 12  
24 months follow-up between the two groups (HT versus SMT). For all analysis, the significance  
25 level for statistical analysis is set at  $\alpha = 0.05$ . Multiple imputation will be applied to deal with  
26 cases of missing data.  
27  
28  
29  
30  
31  
32  
33

### 34 *2.9.2. Secondary outcomes*

35 For the secondary outcomes, including the potential influence on abdominal pain, dyspeptic  
36 symptoms, health related quality of life, anxiety, depression, work absenteeism by parents,  
37 school absenteeism by children, somatization and adequate relief, the Student's *t*-test will  
38 be used for means of normally distributed data, the Mann–Whitney U test for  
39 nonparametric data and the Chi-square test to compare proportions. To calculate the cost-  
40 effectiveness, cost-utility and cost-effectiveness ratios will be calculated for the extra costs  
41 per child with >50% reduction of symptoms of nausea and the extra costs per QALY.  
42 As secondary analysis, the proportion of patients with >50% reduction of their nausea  
43 (severity, incidence and frequency) after treatment, 6 months and 12 months follow up will  
44 be compared between groups using multivariate logistic regression correcting for age and  
45 center.  
46  
47  
48  
49  
50  
51  
52  
53  
54  
55  
56  
57  
58  
59  
60



27 June 2018. v1.

### 3. Amendments

Prior to implementation, amendments will be examined and approved by the METC. The sponsor will only record non-substantial amendments.

### 4. Data monitoring

Hypnotherapy is usually well tolerated in children, without significant side effects. In our previous trials only a minority of children reported some dizziness, mostly during or directly after the end of the first session (Rutten et al., 2014; Vlieger et al., 2007). In case children experience dizziness, they will be advised to execute the remaining sessions in a sitting position instead of a supine position. Children assigned to the SMT group will receive standard medical treatment, including drugs that have been either registered for children, or of which side effects are limited and well known. For these reasons, no Data Monitoring Safety Board will be established.

Study auditing will be accomplished by periodic visits to the participating centers, and by email and telephone contact with local investigators, to ensure the study protocol is being complied with and to discuss any problems that might have arisen.

### 5. Potential harms

In accordance to the legal requirements in the Netherlands (article 10, subsection 1, WMO), the investigator will inform the subjects and the reviewing accredited METC if harmful events occur. When there are indications that the disadvantage of participation may be significantly greater than was described in the research proposal, the study will be suspended pending further review by the accredited METC. However, the study will not be suspended if it would jeopardize participating children's health.

### 6. Ancillary and post-trial care

In accordance with Article 7 WMO and the Measure regarding Compulsory Insurance for Clinical Research in Humans of 23th June 200<sup>th</sup>, the sponsor has liability insurance, which provides cover for potential damage to children caused by the study.

### 7. Data storage

The related information on paper, including 7-day diaries, will be securely stored in a locked file cabinet with limited access. Online questionnaire data will be securely stored using the University's password-protected access systems. Only the main researchers will be given full

27 June 2018. v1.

access to the questionnaire data. All records that contain names will be saved in one file, which will be password protected and only accessible to the main researchers.

## 8. Dissemination policy

The researchers will communicate trial results to the public, health care providers, and other relevant groups via reports, and by publishing in peer-reviewed journals. Negative as well as positive results will be published. The results will be shared with participating children and parents after completion of the trial. All authors who provided substantial contributions to the conduct, interpretation, and reporting of the results will be granted authorship on the final trial report.

## 9. Discussion and conclusion

Chronic nausea is a highly disabling symptom for children with CIN or FD, and poses a risk for negative health outcomes and decreased psychosocial functioning (Kovacic et al., 2013; Perez & Youssef, 2007; Russell et al., 2015). To date large randomized placebo controlled trials evaluating the effect of any drug in children with either CIN or FD are lacking. Current medical treatment aiming to relieve nausea is experienced based, however these treatments are symptomatic and often used for months or years. For these reasons, new effective treatment options to reduce nausea in children with CIN or FD are warranted.

There are indications that HT can decrease symptoms of functional nausea and dyspepsia in adults (Calvert et al., 2002), and functional abdominal pain (FAP) (Vlieger et al., 2007) and chemotherapy induced nausea in children (Richardson, 2007). Calvert et al. (2002) found that adult patients with FD receiving 12 sessions of HT had significantly less dyspeptic symptoms (59%, N=26) compared to patients receiving medical treatment (33%, N=29) ( $p=0.02$ ). These beneficial effects were maintained for more than a year: 56 weeks after the first treatment, 73% of the patients in the HT group reported symptom improvement compared to 43% in the medical treatment group ( $p<0.01$ ). In children with FAP, Vlieger (2007) found that HT was highly superior compared to standard medical care to reduce abdominal pain. At one year follow-up, 85% of the children in the HT group (N=26) were in clinical remission compared to 85% of the children in the SMT group (N=24) ( $p<0.001$ ). Additionally, a systematic review including six RCTs evaluating the effectiveness of

27 June 2018. v1.

1  
2  
3 hypnotherapy to reduce chemotherapy-induced nausea found hypnotherapy was most  
4 effective when compared with standard medical care to reduce complaints ( $D=0.99$ )  
5  
6 (Richardson, 2007).  
7  
8

9  
10 The present study is the first study to investigate the effectiveness of HT on symptoms of  
11 nausea in children and adolescents diagnosed with CIN or FD, according to the Rome IV  
12 criteria. If shown effective, it may provide an additional treatment option for children with  
13 CIN or FD.  
14

15  
16 The study has several strengths. The first strength is that pediatricians from eleven different  
17 hospitals throughout the Netherlands will recruit all children and adolescents. The hospitals,  
18 both an academic center and teaching hospitals, serve an ethnic and socio-economic diverse  
19 population of children and adolescents. This recruitment method has two advantages: first,  
20 it may reduce response bias to the intervention. It has previously been reported that  
21 patients from primary and secondary level care may have different responses to treatment  
22 (Veldhuyzen van Zanten et al., 1999). All children included in the present study receive  
23 secondary level care. The second advantage is that the multicenter design of the study will  
24 increase generalizability of the trial outcomes.  
25

26  
27 Another strength of the study is the long-term follow up of one year, which allows us to  
28 properly compare the potential effectiveness of HT with SMT. It has been known that the  
29 severity of functional gastrointestinal symptoms in children varies over time (Miele et al.,  
30 2004) and a continuous improvement in symptoms is often reported in children receiving  
31 hypnotherapy (Vlieger et al., 2007).  
32

33  
34 This study also has several limitations. The first limitation is that children, parents,  
35 investigators and health care providers are not blinded for the received treatments, which is  
36 not possible due the nature of HT. Several solutions will be applied to limit the risk of bias.  
37 First, to minimize performance bias, pediatricians and hypnotherapists will follow treatment  
38 guidelines to prevent any use of additional or alternative forms of care during the study  
39 period that may influence treatment outcomes. Second, to reduce the risk of detection bias,  
40 children and adolescents use reliable outcome measures and record symptoms themselves  
41 at home. Moreover, children and adolescents record symptoms of nausea for seven  
42 consecutive days, which corrects for individual variability of symptoms over time. Third, the  
43 endpoints of the study will be preregistered and the data analyst will be blinded during the  
44  
45  
46  
47  
48  
49  
50  
51  
52  
53  
54  
55  
56  
57  
58  
59  
60

27 June 2018. v1.

analyses of data.

The second limitation is that the SMT provided by pediatricians in this study may not reflect usual clinical practice. In the present study, children and adolescents receive longer and more intensive medical therapy from their pediatrician compared to the real medical practice situation. However, previous studies indicate that patient-provider interactions can largely influence gastrointestinal treatment outcomes (Dossett et al., 2015). Therefore, it is important to control for the time spent per patient in the SMT group.

If the results of this study show that HT given by a therapist is comparable or slightly more effective than medical treatment provided by pediatricians, HT may become a new treatment strategy to help children with CIN or FD. Furthermore, as HT is presumably less costly than treatments by a specialist it may also decrease health care costs.

### Abbreviations

**APIS:** Abdominal Pain Intensity Subscale; **APFS:** abdominal pain frequency subscale; **CIN:** Chronic Idiopathic Nausea; **CSI:** Children's Somatization Inventory; **FAP:** Functional Abdominal Pain; **FD:** Functional Dyspepsia; **FGID:** Functional Gastrointestinal Disorders; **GI:** gastrointestinal; **HLQ:** Health and Labor Questionnaire; **HT:** Hypnotherapy; **HUI:** Health Utility Index Mark 3; **ITT:** Intention to Treat Analysis; **MEC-U:** Medical Research Ethics Committees United; **NIS:** Nausea Incidence Scale; **NFS:** Nausea Frequency Score; **PPI:** Proton Pump Inhibitors; **QALY:** Quality Adjusted Life Years; **QoL:** Health related Quality of Life; **RCADS-25:** Revised Anxiety and Depression Scale-short version; **RCT:** Randomized Controlled Trial; **REC:** Research Ethical Committees; **SMT:** Standard Medical Care plus supportive therapy; **SON:** Severity Of Nausea; **WMO:** Medical Research Involving Human Subjects Act

### Acknowledgements

None

### Competing interests

The authors declare no competing interests.

### Funding

The Christine Bader Foundation and Gastrointestinal and Liver Foundation supported this work. These funding sources had no role in the design of this study. They will not have any role during the collection of data, analyses or submission of the results.

27 June 2018. v1.

### **Author contributions**

AV is the principle investigator, designed the study, wrote the protocol, supervised the trial and supervised writing the manuscript. PB provided adjustments to the protocol, drafted the manuscript and coordinated the trial. MB critically revised the protocol, supervised the trial and supervised writing the manuscript. All other authors participated in patient recruitment and/or treatment, read and approved the manuscript.

### **Trial status**

Recruitment started in September 2016 and is ongoing. In October 2016, the first participant enrolled. Currently, 92 children are participating in the study (18 of them have completed the study protocol).

### **Ethics approval and consent to participate**

This RCT was approved by the Medical Research Ethics Committees United (MEC-U) in Nieuwegein, the Netherlands (file number: NL51167.100.15). The study will be conducted in accordance with the Medical Research Involving Human Subjects Act (WMO) and conferring to the principles of the Declaration of Helsinki (64th WMA General Assembly, Fortaleza, Brazil, October 2013). The study will follow the conduct code concerning resistance in minors who participate in clinical trials as defined by the Dutch Pediatric Society. Informed consent will be asked from parents/guardians of children <12 years of age. In children and adolescents  $\geq 12$  years of age informed consent will be asked from the parents-guardians and the children and adolescents. In the event of amendments of the protocol, relevant research ethical committees (RECs) will be informed. Results of the study will be publically disclosed in a peer-reviewed journal, without any restrictions; both positive as well as negative results will be published.

### **5 peer reviewers suggested**

Miguel Saps (msaps@childrensmemrial.org), Miranda van Tilburg (Tilburg@med.unc.edu), Peter Whorwell (peter.whorwell@snuht.nwest.nhs.uk), Olafur Palsson (opalsson@med.unc.edu), Juliette Rutten (j.m.rutten@amc.uva.nl), Emma Louise Calvert.

27 June 2018. v1.

## References

- Baxter, A. L., Watcha, M. F., Baxter, W. V., Leong, T., & Wyatt, M. M. (2011). Development and validation of a pictorial nausea rating scale for children. *Pediatrics*, *127*(6), e1542–9. <http://doi.org/10.1542/peds.2010-1410>
- Brook, R. A., Kleinman, N. L., Choung, R. S., Melkonian, A. K., Smeeding, J. E., & Talley, N. J. (2010). Functional Dyspepsia Impacts Absenteeism and Direct and Indirect Costs. *Clinical Gastroenterology and Hepatology*, *8*(6), 498–503. <http://doi.org/10.1016/j.cgh.2010.03.003>
- Calvert, E. L., Houghton, L. A., Cooper, P., Morris, J., & Whorwell, P. J. (2002). Long-term improvement in functional dyspepsia using hypnotherapy. *Gastroenterology*, *123*(6), 1778–1785. <http://doi.org/10.1053/gast.2002.37071>
- Canan, O., Ozcay, F., Ozbay-Hosnut, F., Yazici, C., & Bilezikci, B. (2011). Value of the Likert dyspepsia scale in differentiation of functional and organic dyspepsia in children. *Journal of Pediatric Gastroenterology and Nutrition*, *52*(4), 392–8. <http://doi.org/10.1097/MPG.0b013e3181fea0a9>
- De Luca, L., Zagari, R. M., Pozzato, P., Fiorini, T., Ricciardiello, L., Martuzzi, C., ... Veldhuyzen van Zanten, S. J. O. (2004). Measuring dyspepsia: a new severity index validated in Bologna. *Digestive and Liver Disease*, *36*(12), 806–810. <http://doi.org/10.1016/j.dld.2004.07.010>
- Dossett, M. L., Mu, L., Davis, R. B., Bell, I. R., Lembo, A. J., Kaptchuk, T. J., & Yeh, G. Y. (2015). Patient-Provider Interactions Affect Symptoms in Gastroesophageal Reflux Disease: A Pilot Randomized, Double-Blind, Placebo-Controlled Trial. *PLOS ONE*, *10*(9), e0136855. <http://doi.org/10.1371/journal.pone.0136855>
- Eiser, C., & Morse, R. (2001). The measurement of quality of life in children: past and future perspectives. *Journal of Developmental and Behavioral Pediatrics : JDBP*, *22*(4), 248–56. Retrieved from <http://www.ncbi.nlm.nih.gov/pubmed/11530898>
- Feeny, D., Furlong, W., Torrance, G. W., Goldsmith, C. H., Zhu, Z., DePauw, S., ... Boyle, M. (2002). Multiattribute and single-attribute utility functions for the health utilities index mark 3 system. *Medical Care*, *40*(2), 113–28. Retrieved from <http://www.ncbi.nlm.nih.gov/pubmed/11802084>
- Gonsalkorale, W. M., Houghton, L. A., & Whorwell, P. J. (2002). Hypnotherapy in irritable bowel syndrome: a large-scale audit of a clinical service with examination of factors influencing responsiveness. *The American Journal of Gastroenterology*, *97*(4), 954–961. <http://doi.org/10.1111/j.1572-0241.2002.05615.x>
- Häuser, W., Hagl, M., Schmierer, A., & Hansen, E. (2016). The Efficacy, Safety and Applications of Medical Hypnosis. *Deutsches Arzteblatt International*, *113*(17), 289–96. <http://doi.org/10.3238/arztebl.2016.0289>
- Hyams, J. S., Di Lorenzo, C., Saps, M., Shulman, R. J., Staiano, A., & van Tilburg, M. (2016). Childhood Functional Gastrointestinal Disorders: Child/Adolescent. *Gastroenterology*, *150*(6), 1456–1468.e2. <http://doi.org/10.1053/j.gastro.2016.02.015>
- Kellow, J. E., Azpiroz, F., Delvaux, M., Gebhart, G. F., Mertz, H. R., Quigley, E. M. M., & Smout, A. J. P. M. (2006). Applied Principles of Neurogastroenterology: Physiology/Motility Sensation. *Gastroenterology*, *130*(5), 1412–1420. <http://doi.org/10.1053/j.gastro.2005.08.061>
- Kovacic, K., Williams, S., Li, B. U. K., Chelimsky, G., & Miranda, A. (2013). High prevalence of nausea in children with pain-associated functional gastrointestinal disorders: are Rome criteria applicable? *Journal of Pediatric Gastroenterology and Nutrition*, *57*(3), 311–5.

27 June 2018. v1.

1  
2  
3 <http://doi.org/10.1097/MPG.0b013e3182964203>

4  
5 Lea, R., Houghton, L. A., Calvert, E. L., Larder, S., Gonsalkorale, W. M., Whelan, V., ... Whorwell, P. J.  
6 (2003). Gut-focused hypnotherapy normalizes disordered rectal sensitivity in patients with  
7 irritable bowel syndrome. *Alimentary Pharmacology & Therapeutics*, 17(5), 635–42. Retrieved  
8 from <http://www.ncbi.nlm.nih.gov/pubmed/12641511>

9  
10 Lowén, M. B. O., Mayer, E. A., Sjöberg, M., Tillisch, K., Naliboff, B., Labus, J., ... Walter, S. A. (2013).  
11 Effect of hypnotherapy and educational intervention on brain response to visceral stimulus in  
12 the irritable bowel syndrome. *Alimentary Pharmacology & Therapeutics*, 37(12), 1184–1197.  
13 <http://doi.org/10.1111/apt.12319>

14  
15 Madani, S., Cortes, O., & Thomas, R. (2016). Cyproheptadine Use in Children With Functional  
16 Gastrointestinal Disorders. *Journal of Pediatric Gastroenterology and Nutrition*, 62(3), 409–413.  
17 <http://doi.org/10.1097/MPG.0000000000000964>

18  
19 Mangel, A., Hahn, B., Heath, A., Northcutt, A., Kong, S., Dukes, G., & McSorley, D. (1998). Adequate  
20 Relief as an Endpoint in Clinical Trials in Irritable Bowel Syndrome. *Journal of International  
21 Medical Research*, 26(2), 76–81. <http://doi.org/10.1177/030006059802600203>

22  
23 Meesters, C., Muris, P., Ghys, A., Reumerman, T., & Rooijmans, M. (2003). The Children's  
24 Somatization Inventory: further evidence for its reliability and validity in a pediatric and a  
25 community sample of Dutch children and adolescents. *Journal of Pediatric Psychology*, 28(6),  
26 413–22. Retrieved from <http://www.ncbi.nlm.nih.gov/pubmed/12904453>

27  
28 Miele, E., Simeone, D., Marino, A., Greco, L., Auricchio, R., Novak, S. J., & Staiano, A. (2004).  
29 Functional Gastrointestinal Disorders in Children: An Italian Prospective Survey. Retrieved from  
30 [http://pediatrics.aappublications.org/content/pediatrics/114/1/73.full.pdf?casa\\_token=RmclJv  
31 dUTNYAAAAA:lgptkif02xEXwN1OJtqSVQxq7shfjbdFZloAjUVlbrX8oaJKTbIpimCFbzSHpm91pl\\_\\_x  
32 oFRnk](http://pediatrics.aappublications.org/content/pediatrics/114/1/73.full.pdf?casa_token=RmclJv<br/>31 dUTNYAAAAA:lgptkif02xEXwN1OJtqSVQxq7shfjbdFZloAjUVlbrX8oaJKTbIpimCFbzSHpm91pl__x<br/>32 oFRnk)

33  
34 Miller, V., Carruthers, H. R., Morris, J., Hasan, S. S., Archbold, S., & Whorwell, P. J. (2015).  
35 Hypnotherapy for irritable bowel syndrome: an audit of one thousand adult patients.  
36 *Alimentary Pharmacology & Therapeutics*, 41(9), 844–855. <http://doi.org/10.1111/apt.13145>

37  
38 Muris, P., Meesters, C., & Schouten, E. (2002). A brief questionnaire of DSM-IV-defined anxiety and  
39 depression symptoms among children. *Clinical Psychology & Psychotherapy*, 9(6), 430–442.  
40 <http://doi.org/10.1002/cpp.347>

41  
42 Oudenhove, L. Van, Vandenberghe, J., Geeraerts, B., Vos, R., Persoons, P., Fischler, B., ... Tack, J.  
43 (2008). Determinants of symptoms in functional dyspepsia: gastric sensorimotor function,  
44 psychosocial factors or somatisation? <http://doi.org/10.1136/gut.2008.158162>

45  
46 Perez, M. E., & Youssef, N. N. (2007). Dyspepsia in childhood and adolescence: insights and  
47 treatment considerations. *Current Gastroenterology Reports*, 9(6), 447–55. Retrieved from  
48 <http://www.ncbi.nlm.nih.gov/pubmed/18377794>

49  
50 Perez, P. F., Doré, J., Leclerc, M., Levenez, F., Benyacoub, J., Serrant, P., ... Donnet-Hughes, A. (2007).  
51 Bacterial imprinting of the neonatal immune system: lessons from maternal cells? *Pediatrics*,  
52 119(3), e724–32. <http://doi.org/10.1542/peds.2006-1649>

53  
54 Prior, A., Colgan, S. M., & Whorwell, P. J. (1990). Changes in rectal sensitivity after hypnotherapy in  
55 patients with irritable bowel syndrome. *Gut*, 31(8), 896–8. Retrieved from  
56 <http://www.ncbi.nlm.nih.gov/pubmed/2387513>

27 June 2018. v1.

- 1  
2  
3 Ravens-Sieberer, U., Gosch, A., Rajmil, L., Erhart, M., Bruil, J., Power, M., ... KIDSCREEN Group. (2008).  
4 The KIDSCREEN-52 Quality of Life Measure for Children and Adolescents: Psychometric Results  
5 from a Cross-Cultural Survey in 13 European Countries. *Value in Health*, *11*(4), 645–658.  
6 <http://doi.org/10.1111/j.1524-4733.2007.00291.x>  
7  
8 Richardson, J., Smith, J. E., McCall, G., Richardson, A., Pilkington, K., & Kirsch, I. (2007). Hypnosis for  
9 nausea and vomiting in cancer chemotherapy: a systematic review of the research evidence.  
10 *Eur J Cancer Care (Engl)*, *16*(5), 402–412. <http://doi.org/10.1111/j.1365-2354.2006.00736.x>  
11  
12 Robin, S. G., Keller, C., Zwiener, R., Hyman, P. E., Nurko, S., Saps, M., ... L van Tilburg, M. A. (2017).  
13 Prevalence of Pediatric Functional Gastrointestinal Disorders Utilizing the Rome IV Criteria.  
14 <http://doi.org/10.1016/j.jpeds.2017.12.012>  
15  
16 Rodriguez, L., Diaz, J., & Nurko, S. (2013). Safety and Efficacy of Cyproheptadine for Treating  
17 Dyspeptic Symptoms in Children. *The Journal of Pediatrics*, *163*(1), 261–267.  
18 <http://doi.org/10.1016/J.JPEDS.2012.12.096>  
19  
20 Russell, A., Sherman, A. L., & Walker, L. S. (2015). 620 Nausea Complicating Recurrent Abdominal  
21 Pain in Childhood Predicts Functional GI Disorders, Disability, Depression and Anxiety in Young  
22 Adulthood: Results of a Prospective Cohort Study. *Gastroenterology*, *148*(4), S–122.  
23 [http://doi.org/10.1016/S0016-5085\(15\)30423-6](http://doi.org/10.1016/S0016-5085(15)30423-6)  
24  
25 Rutten, J. M. T. M., Vlieger, A. M., Frankenhuis, C., George, E. K., Groeneweg, M., Norbruis, O. F., ...  
26 Benninga, M. A. (2017). Home-Based Hypnotherapy Self-exercises vs Individual Hypnotherapy  
27 With a Therapist for Treatment of Pediatric Irritable Bowel Syndrome, Functional Abdominal  
28 Pain, or Functional Abdominal Pain Syndrome. *JAMA Pediatrics*, *171*(5), 470.  
29 <http://doi.org/10.1001/jamapediatrics.2017.0091>  
30  
31 Rutten, J. M., Vlieger, A. M., Frankenhuis, C., George, E. K., Groeneweg, M., Norbruis, O. F., ...  
32 Benninga, M. A. (2014). Gut-directed hypnotherapy in children with irritable bowel syndrome or  
33 functional abdominal pain (syndrome): a randomized controlled trial on self exercises at home  
34 using CD versus individual therapy by qualified therapists. *BMC Pediatrics*, *14*(1), 140.  
35 <http://doi.org/10.1186/1471-2431-14-140>  
36  
37 Tarride, J.-E., Burke, N., Bischof, M., Hopkins, R. B., Goeree, L., Campbell, K., ... Goeree, R. (2010). A  
38 review of health utilities across conditions common in paediatric and adult populations. *Health*  
39 *and Quality of Life Outcomes*, *8*, 12. <http://doi.org/10.1186/1477-7525-8-12>  
40  
41 The Kidscreen Group Europe. (2006). *The KIDSCREEN questionnaires: Quality of life questionnaires for*  
42 *children and adolescents*. Lengerich.  
43  
44 Van Roijen, L., Essink-bot, M.-L., Koopmanschap, M. A., Bonsel, G., & Rutten, F. F. H. (1996). Labor  
45 and Health Status in Economic Evaluation of Health Care: The Health and Labor Questionnaire.  
46 *International Journal of Technology Assessment in Health Care*, *12*(03), 405–415.  
47 <http://doi.org/10.1017/S0266462300009764>  
48  
49 Veldhuyzen van Zanten, S. J., Talley, N. J., Bytzer, P., Klein, K. B., Whorwell, P. J., & Zinsmeister, A. R.  
50 (1999). Design of treatment trials for functional gastrointestinal disorders. *Gut*, *45* Suppl 2(suppl  
51 2), II69–77. <http://doi.org/10.1136/GUT.45.2008.II69>  
52  
53 Vlieger, A. M., Menko-Frankenhuis, C., Wolfkamp, S. C. S., Tromp, E., & Benninga, M. A. (2007).  
54 Hypnotherapy for children with functional abdominal pain or irritable bowel syndrome: a  
55 randomized controlled trial. *Gastroenterology*, *133*(5), 1430–6.  
56 <http://doi.org/10.1053/j.gastro.2007.08.072>  
57  
58  
59



27 June 2018. v1.

1  
2  
3 Vlieger, A. M., Rutten, J. M. T. M., Govers, A. M. A. P., Frankenhuis, C., & Benninga, M. A. (2012).  
4 Long-term follow-up of gut-directed hypnotherapy vs. standard care in children with functional  
5 abdominal pain or irritable bowel syndrome. *The American Journal of Gastroenterology*, 107(4),  
6 627–31. <http://doi.org/10.1038/ajg.2011.487>

7  
8 Whorwell, P. J., Houghton, L. A., Taylor, E. E., & Maxton, D. G. (1992). Physiological effects of  
9 emotion: assessment via hypnosis. *Lancet (London, England)*, 340(8811), 69–72. Retrieved from  
10 <http://www.ncbi.nlm.nih.gov/pubmed/1352012>

11  
12 World Medical Association Declaration of Helsinki Ethical Principles for Medical Research Involving  
13 Human Subjects. (1964). *WMA General Assembly, Somerset West, Republic of South Africa*.  
14 Retrieved from <https://www.wma.net/wp-content/uploads/2016/11/DoH-Oct2013-JAMA.pdf>

15  
16  
17  
18  
19  
20  
21  
22  
23  
24  
25  
26  
27  
28  
29  
30  
31  
32  
33  
34  
35  
36  
37  
38  
39  
40  
41  
42  
43  
44  
45  
46  
47  
48  
49  
50  
51  
52  
53  
54  
55  
56  
57  
58  
59  
60

For peer review only

1  
2  
3  
4  
5  
6  
7  
8  
9  
10  
11  
12  
13  
14  
15  
16  
17  
18  
19  
20  
21  
22  
23  
24  
25  
26  
27  
28  
29  
30  
31  
32  
33  
34  
35  
36  
37  
38  
39  
40  
41  
42  
43  
44  
45  
46  
47  
48  
49  
50  
51  
52  
53  
54  
55  
56  
57  
58  
59  
60

| TIMEPOINT                                                      | Enrolment              | Allocation              | During treatment                          |                                            | Follow-up               |                          |
|----------------------------------------------------------------|------------------------|-------------------------|-------------------------------------------|--------------------------------------------|-------------------------|--------------------------|
|                                                                | Before treatment (t-1) | Start of treatment (t0) | 6 weeks after the start of treatment (t1) | 3 months after the start of treatment (t2) | 6 months follow-up (t3) | 12 months follow-up (t4) |
| <b>ENROLMENT:</b>                                              |                        |                         |                                           |                                            |                         |                          |
| Eligibility screen                                             | X                      |                         |                                           |                                            |                         |                          |
| Informed consent                                               | X                      |                         |                                           |                                            |                         |                          |
| Randomization                                                  | X                      |                         |                                           |                                            |                         |                          |
| <b>INTERVENTIONS:</b>                                          |                        |                         |                                           |                                            |                         |                          |
| Hypnotherapy group (HT)                                        |                        | ←————→                  |                                           |                                            |                         |                          |
| Standard medical care group (SMT)                              |                        | ←————→                  |                                           |                                            |                         |                          |
| <b>ASSESSMENTS:</b>                                            |                        |                         |                                           |                                            |                         |                          |
| Nausea and abdominal pain                                      | X                      |                         | X                                         | X                                          | X                       | X                        |
| Dyspeptic symptoms                                             |                        | X                       |                                           | X                                          | X                       | X                        |
| Health related quality of life                                 |                        | X                       |                                           | X                                          | X                       | X                        |
| Anxiety and Depression                                         |                        | X                       |                                           | X                                          | X                       | X                        |
| Cost effectiveness/cost utility                                |                        | X                       |                                           | X                                          | X                       | X                        |
| Work absenteeism by parents and school absenteeism by children |                        | X                       |                                           | X                                          | X                       | X                        |
| Somatization                                                   |                        | X                       |                                           | X                                          | X                       | X                        |
| Adequate relief                                                |                        |                         |                                           |                                            | X                       | X                        |

Figure 1. Standard Protocol Items: Recommendations for Interventional Trials (SPIRIT) Figure displaying the trial design and the outcome measurements. After screening for eligibility (t-1), children and parents sign the informed consent form and fill in the baseline questionnaire (t0). Children are then randomized in the hypnotherapy (HT) or standard medical care (SMT) group. Assessments take place before the start of treatment (baseline; t0), 6 weeks after the start of treatment (t1), 3 months after the start of treatment (t2), 6 months follow-up (t3) and 12 months follow-up (t4).

215x279mm (300 x 300 DPI)

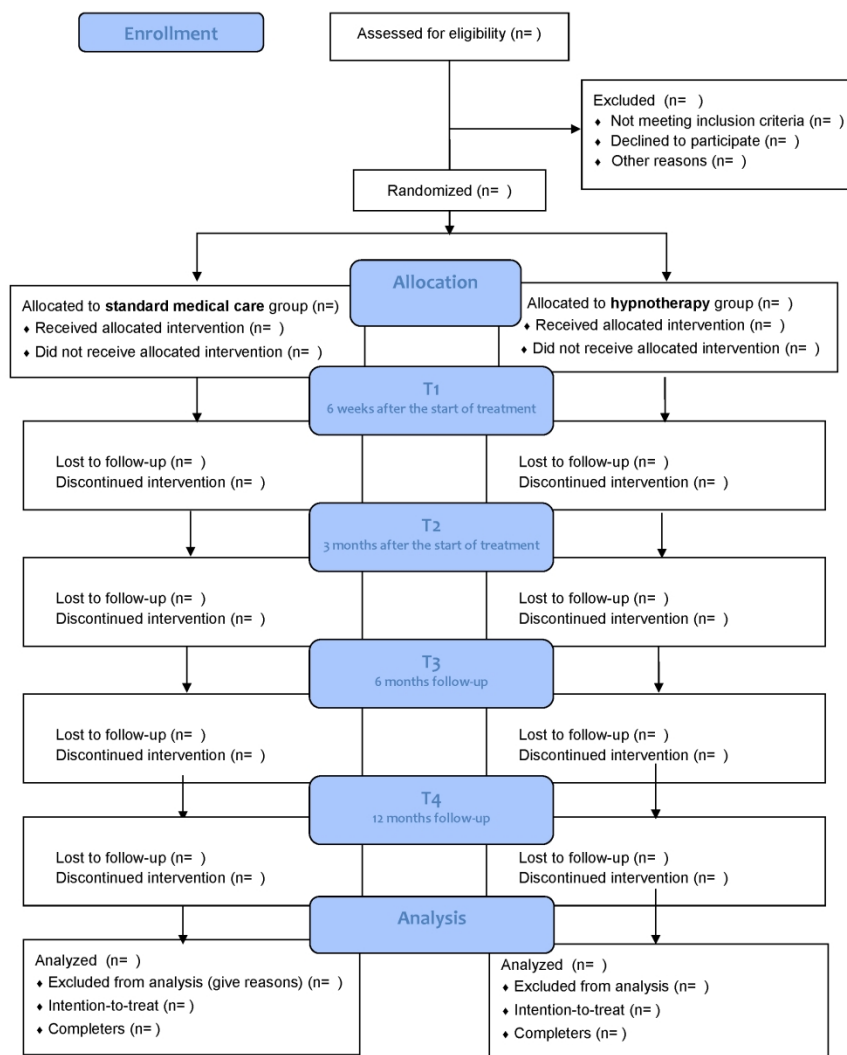

45 Figure 2. The Consolidated Standards of Reporting Trials (CONSORT) flow diagram indicating the number of  
46 participants throughout the study. After eligibility screening, children are randomized in either the  
47 hypnotherapy (HT) or standard medical care (SMT) group. Follow-up measurements take place at 6 weeks  
48 after the start of treatment (t<sub>1</sub>), 3 months after the start of treatment (t<sub>2</sub>), and 6 months follow-up (t<sub>3</sub>) and  
49 12 months follow-up (t<sub>4</sub>).

50 215x279mm (300 x 300 DPI)

# Reporting checklist for protocol of a clinical trial.

Based on the SPIRIT guidelines.

## Instructions to authors

Complete this checklist by entering the page numbers from your manuscript where readers will find each of the items listed below.

Your article may not currently address all the items on the checklist. Please modify your text to include the missing information. If you are certain that an item does not apply, please write "n/a" and provide a short explanation.

Upload your completed checklist as an extra file when you submit to a journal.

In your methods section, say that you used the SPIRIT reporting guidelines, and cite them as:

Chan A-W, Tetzlaff JM, Altman DG, Laupacis A, Gøtzsche PC, Krleža-Jerić K, Hróbjartsson A, Mann H, Dickersin K, Berlin J, Doré C, Parulekar W, Summerskill W, Groves T, Schulz K, Sox H, Rockhold FW, Rennie D, Moher D. SPIRIT 2013 Statement: Defining standard protocol items for clinical trials. *Ann Intern Med.* 2013;158(3):200-207

|                                             |     | Reporting Item                                                                                               | Page Number |
|---------------------------------------------|-----|--------------------------------------------------------------------------------------------------------------|-------------|
| Title                                       | #1  | Descriptive title identifying the study design, population, interventions, and, if applicable, trial acronym | 1           |
| Trial registration                          | #2a | Trial identifier and registry name. If not yet registered, name of intended registry                         | 2           |
| Trial registration: data set                | #2b | All items from the World Health Organization Trial Registration Data Set                                     | 3-14        |
| Protocol version                            | #3  | Date and version identifier                                                                                  | 1           |
| Funding                                     | #4  | Sources and types of financial, material, and other support                                                  | 18          |
| Roles and responsibilities: contributorship | #5a | Names, affiliations, and roles of protocol contributors                                                      | 1, 18       |
| Roles and                                   | #5b | Name and contact information for the trial sponsor                                                           | 18          |

|    |                      |      |                                                                   |      |
|----|----------------------|------|-------------------------------------------------------------------|------|
| 1  | responsibilities:    |      |                                                                   |      |
| 2  | sponsor contact      |      |                                                                   |      |
| 3  | information          |      |                                                                   |      |
| 4  |                      |      |                                                                   |      |
| 5  |                      |      |                                                                   |      |
| 6  | Roles and            | #5c  | Role of study sponsor and funders, if any, in study design;       | 18   |
| 7  | responsibilities:    |      | collection, management, analysis, and interpretation of           |      |
| 8  | sponsor and funder   |      | data; writing of the report; and the decision to submit the       |      |
| 9  |                      |      | report for publication, including whether they will have          |      |
| 10 |                      |      | ultimate authority over any of these activities                   |      |
| 11 |                      |      |                                                                   |      |
| 12 |                      |      |                                                                   |      |
| 13 |                      |      |                                                                   |      |
| 14 | Roles and            | #5d  | Composition, roles, and responsibilities of the coordinating      | NA   |
| 15 | responsibilities:    |      | centre, steering committee, endpoint adjudication                 |      |
| 16 | committees           |      | committee, data management team, and other individuals or         |      |
| 17 |                      |      | groups overseeing the trial, if applicable (see Item 21a for      |      |
| 18 |                      |      | data monitoring committee)                                        |      |
| 19 |                      |      |                                                                   |      |
| 20 |                      |      |                                                                   |      |
| 21 |                      |      |                                                                   |      |
| 22 |                      |      |                                                                   |      |
| 23 | Background and       | #6a  | Description of research question and justification for            | 3, 4 |
| 24 | rationale            |      | undertaking the trial, including summary of relevant studies      |      |
| 25 |                      |      | (published and unpublished) examining benefits and harms          |      |
| 26 |                      |      | for each intervention                                             |      |
| 27 |                      |      |                                                                   |      |
| 28 |                      |      |                                                                   |      |
| 29 |                      |      |                                                                   |      |
| 30 | Background and       | #6b  | Explanation for choice of comparators                             | 5    |
| 31 | rationale: choice of |      |                                                                   |      |
| 32 | comparators          |      |                                                                   |      |
| 33 |                      |      |                                                                   |      |
| 34 |                      |      |                                                                   |      |
| 35 | Objectives           | #7   | Specific objectives or hypotheses                                 | 4    |
| 36 |                      |      |                                                                   |      |
| 37 |                      |      |                                                                   |      |
| 38 | Trial design         | #8   | Description of trial design including type of trial (eg, parallel | 5    |
| 39 |                      |      | group, crossover, factorial, single group), allocation ratio,     |      |
| 40 |                      |      | and framework (eg, superiority, equivalence, non-inferiority,     |      |
| 41 |                      |      | exploratory)                                                      |      |
| 42 |                      |      |                                                                   |      |
| 43 |                      |      |                                                                   |      |
| 44 |                      |      |                                                                   |      |
| 45 | Study setting        | #9   | Description of study settings (eg, community clinic,              | 5    |
| 46 |                      |      | academic hospital) and list of countries where data will be       |      |
| 47 |                      |      | collected. Reference to where list of study sites can be          |      |
| 48 |                      |      | obtained                                                          |      |
| 49 |                      |      |                                                                   |      |
| 50 |                      |      |                                                                   |      |
| 51 |                      |      |                                                                   |      |
| 52 | Eligibility criteria | #10  | Inclusion and exclusion criteria for participants. If applicable, | 6    |
| 53 |                      |      | eligibility criteria for study centres and individuals who will   |      |
| 54 |                      |      | perform the interventions (eg, surgeons, psychotherapists)        |      |
| 55 |                      |      |                                                                   |      |
| 56 |                      |      |                                                                   |      |
| 57 |                      |      |                                                                   |      |
| 58 | Interventions:       | #11a | Interventions for each group with sufficient detail to allow      | 7-9  |
| 59 |                      |      |                                                                   |      |
| 60 |                      |      |                                                                   |      |

|    |                                 |      |                                                                                                                                                                                                                                                                                                                                                                                |       |
|----|---------------------------------|------|--------------------------------------------------------------------------------------------------------------------------------------------------------------------------------------------------------------------------------------------------------------------------------------------------------------------------------------------------------------------------------|-------|
| 1  | description                     |      | replication, including how and when they will be administered                                                                                                                                                                                                                                                                                                                  |       |
| 2  |                                 |      |                                                                                                                                                                                                                                                                                                                                                                                |       |
| 3  |                                 |      |                                                                                                                                                                                                                                                                                                                                                                                |       |
| 4  | Interventions:                  | #11b | Criteria for discontinuing or modifying allocated interventions for a given trial participant (eg, drug dose change in response to harms, participant request, or improving / worsening disease)                                                                                                                                                                               | 9, 15 |
| 5  | modifications                   |      |                                                                                                                                                                                                                                                                                                                                                                                |       |
| 6  |                                 |      |                                                                                                                                                                                                                                                                                                                                                                                |       |
| 7  |                                 |      |                                                                                                                                                                                                                                                                                                                                                                                |       |
| 8  |                                 |      |                                                                                                                                                                                                                                                                                                                                                                                |       |
| 9  |                                 |      |                                                                                                                                                                                                                                                                                                                                                                                |       |
| 10 |                                 |      |                                                                                                                                                                                                                                                                                                                                                                                |       |
| 11 | Interventions:                  | #11c | Strategies to improve adherence to intervention protocols, and any procedures for monitoring adherence (eg, drug tablet return; laboratory tests)                                                                                                                                                                                                                              | 9     |
| 12 | adherence                       |      |                                                                                                                                                                                                                                                                                                                                                                                |       |
| 13 |                                 |      |                                                                                                                                                                                                                                                                                                                                                                                |       |
| 14 |                                 |      |                                                                                                                                                                                                                                                                                                                                                                                |       |
| 15 |                                 |      |                                                                                                                                                                                                                                                                                                                                                                                |       |
| 16 |                                 |      |                                                                                                                                                                                                                                                                                                                                                                                |       |
| 17 | Interventions:                  | #11d | Relevant concomitant care and interventions that are permitted or prohibited during the trial                                                                                                                                                                                                                                                                                  | 9     |
| 18 | concomitant care                |      |                                                                                                                                                                                                                                                                                                                                                                                |       |
| 19 |                                 |      |                                                                                                                                                                                                                                                                                                                                                                                |       |
| 20 |                                 |      |                                                                                                                                                                                                                                                                                                                                                                                |       |
| 21 | Outcomes                        | #12  | Primary, secondary, and other outcomes, including the specific measurement variable (eg, systolic blood pressure), analysis metric (eg, change from baseline, final value, time to event), method of aggregation (eg, median, proportion), and time point for each outcome. Explanation of the clinical relevance of chosen efficacy and harm outcomes is strongly recommended | 9-13  |
| 22 |                                 |      |                                                                                                                                                                                                                                                                                                                                                                                |       |
| 23 |                                 |      |                                                                                                                                                                                                                                                                                                                                                                                |       |
| 24 |                                 |      |                                                                                                                                                                                                                                                                                                                                                                                |       |
| 25 |                                 |      |                                                                                                                                                                                                                                                                                                                                                                                |       |
| 26 |                                 |      |                                                                                                                                                                                                                                                                                                                                                                                |       |
| 27 |                                 |      |                                                                                                                                                                                                                                                                                                                                                                                |       |
| 28 |                                 |      |                                                                                                                                                                                                                                                                                                                                                                                |       |
| 29 |                                 |      |                                                                                                                                                                                                                                                                                                                                                                                |       |
| 30 |                                 |      |                                                                                                                                                                                                                                                                                                                                                                                |       |
| 31 |                                 |      |                                                                                                                                                                                                                                                                                                                                                                                |       |
| 32 | Participant timeline            | #13  | Time schedule of enrolment, interventions (including any run-ins and washouts), assessments, and visits for participants. A schematic diagram is highly recommended (see Figure)                                                                                                                                                                                               | 5     |
| 33 |                                 |      |                                                                                                                                                                                                                                                                                                                                                                                |       |
| 34 |                                 |      |                                                                                                                                                                                                                                                                                                                                                                                |       |
| 35 |                                 |      |                                                                                                                                                                                                                                                                                                                                                                                |       |
| 36 |                                 |      |                                                                                                                                                                                                                                                                                                                                                                                |       |
| 37 |                                 |      |                                                                                                                                                                                                                                                                                                                                                                                |       |
| 38 |                                 |      |                                                                                                                                                                                                                                                                                                                                                                                |       |
| 39 |                                 |      |                                                                                                                                                                                                                                                                                                                                                                                |       |
| 40 | Sample size                     | #14  | Estimated number of participants needed to achieve study objectives and how it was determined, including clinical and statistical assumptions supporting any sample size calculations                                                                                                                                                                                          | 13-14 |
| 41 |                                 |      |                                                                                                                                                                                                                                                                                                                                                                                |       |
| 42 |                                 |      |                                                                                                                                                                                                                                                                                                                                                                                |       |
| 43 |                                 |      |                                                                                                                                                                                                                                                                                                                                                                                |       |
| 44 |                                 |      |                                                                                                                                                                                                                                                                                                                                                                                |       |
| 45 |                                 |      |                                                                                                                                                                                                                                                                                                                                                                                |       |
| 46 |                                 |      |                                                                                                                                                                                                                                                                                                                                                                                |       |
| 47 | Recruitment                     | #15  | Strategies for achieving adequate participant enrolment to reach target sample size                                                                                                                                                                                                                                                                                            | 5     |
| 48 |                                 |      |                                                                                                                                                                                                                                                                                                                                                                                |       |
| 49 |                                 |      |                                                                                                                                                                                                                                                                                                                                                                                |       |
| 50 |                                 |      |                                                                                                                                                                                                                                                                                                                                                                                |       |
| 51 | Allocation: sequence generation | #16a | Method of generating the allocation sequence (eg, computer-generated random numbers), and list of any factors for stratification. To reduce predictability of a random sequence, details of any planned restriction (eg, blocking) should be provided in a separate document that is unavailable to those who enrol participants or assign                                     | 6-7   |
| 52 |                                 |      |                                                                                                                                                                                                                                                                                                                                                                                |       |
| 53 |                                 |      |                                                                                                                                                                                                                                                                                                                                                                                |       |
| 54 |                                 |      |                                                                                                                                                                                                                                                                                                                                                                                |       |
| 55 |                                 |      |                                                                                                                                                                                                                                                                                                                                                                                |       |
| 56 |                                 |      |                                                                                                                                                                                                                                                                                                                                                                                |       |
| 57 |                                 |      |                                                                                                                                                                                                                                                                                                                                                                                |       |
| 58 |                                 |      |                                                                                                                                                                                                                                                                                                                                                                                |       |
| 59 |                                 |      |                                                                                                                                                                                                                                                                                                                                                                                |       |
| 60 |                                 |      |                                                                                                                                                                                                                                                                                                                                                                                |       |

|    |                       |      |                                                                |       |
|----|-----------------------|------|----------------------------------------------------------------|-------|
| 1  |                       |      | interventions                                                  |       |
| 2  |                       |      |                                                                |       |
| 3  | Allocation            | #16b | Mechanism of implementing the allocation sequence (eg,         | 6-7   |
| 4  | concealment           |      | central telephone; sequentially numbered, opaque, sealed       |       |
| 5  | mechanism             |      | envelopes), describing any steps to conceal the sequence       |       |
| 6  |                       |      | until interventions are assigned                               |       |
| 7  |                       |      |                                                                |       |
| 8  |                       |      |                                                                |       |
| 9  |                       |      |                                                                |       |
| 10 | Allocation:           | #16c | Who will generate the allocation sequence, who will enrol      | 6-7   |
| 11 | implementation        |      | participants, and who will assign participants to              |       |
| 12 |                       |      | interventions                                                  |       |
| 13 |                       |      |                                                                |       |
| 14 |                       |      |                                                                |       |
| 15 | Blinding (masking)    | #17a | Who will be blinded after assignment to interventions (eg,     | 6-7   |
| 16 |                       |      | trial participants, care providers, outcome assessors, data    |       |
| 17 |                       |      | analysts), and how                                             |       |
| 18 |                       |      |                                                                |       |
| 19 |                       |      |                                                                |       |
| 20 |                       |      |                                                                |       |
| 21 | Blinding (masking):   | #17b | If blinded, circumstances under which unblinding is            | NA    |
| 22 | emergency             |      | permissible, and procedure for revealing a participant's       |       |
| 23 | unblinding            |      | allocated intervention during the trial                        |       |
| 24 |                       |      |                                                                |       |
| 25 |                       |      |                                                                |       |
| 26 | Data collection plan  | #18a | Plans for assessment and collection of outcome, baseline,      | 9-13  |
| 27 |                       |      | and other trial data, including any related processes to       |       |
| 28 |                       |      | promote data quality (eg, duplicate measurements, training     |       |
| 29 |                       |      | of assessors) and a description of study instruments (eg,      |       |
| 30 |                       |      | questionnaires, laboratory tests) along with their reliability |       |
| 31 |                       |      | and validity, if known. Reference to where data collection     |       |
| 32 |                       |      | forms can be found, if not in the protocol                     |       |
| 33 |                       |      |                                                                |       |
| 34 |                       |      |                                                                |       |
| 35 |                       |      |                                                                |       |
| 36 |                       |      |                                                                |       |
| 37 |                       |      |                                                                |       |
| 38 | Data collection plan: | #18b | Plans to promote participant retention and complete follow-    | 9     |
| 39 | retention             |      | up, including list of any outcome data to be collected for     |       |
| 40 |                       |      | participants who discontinue or deviate from intervention      |       |
| 41 |                       |      | protocols                                                      |       |
| 42 |                       |      |                                                                |       |
| 43 |                       |      |                                                                |       |
| 44 |                       |      |                                                                |       |
| 45 | Data management       | #19  | Plans for data entry, coding, security, and storage, including | 15    |
| 46 |                       |      | any related processes to promote data quality (eg, double      |       |
| 47 |                       |      | data entry; range checks for data values). Reference to        |       |
| 48 |                       |      | where details of data management procedures can be             |       |
| 49 |                       |      | found, if not in the protocol                                  |       |
| 50 |                       |      |                                                                |       |
| 51 |                       |      |                                                                |       |
| 52 |                       |      |                                                                |       |
| 53 |                       |      |                                                                |       |
| 54 | Statistics: outcomes  | #20a | Statistical methods for analysing primary and secondary        | 14-15 |
| 55 |                       |      | outcomes. Reference to where other details of the statistical  |       |
| 56 |                       |      | analysis plan can be found, if not in the protocol             |       |
| 57 |                       |      |                                                                |       |
| 58 |                       |      |                                                                |       |
| 59 |                       |      |                                                                |       |
| 60 |                       |      |                                                                |       |

|    |                        |      |                                                                  |    |
|----|------------------------|------|------------------------------------------------------------------|----|
| 1  | Statistics: additional | #20b | Methods for any additional analyses (eg, subgroup and            | NA |
| 2  | analyses               |      | adjusted analyses)                                               |    |
| 3  |                        |      |                                                                  |    |
| 4  |                        |      |                                                                  |    |
| 5  | Statistics: analysis   | #20c | Definition of analysis population relating to protocol non-      | 14 |
| 6  | population and         |      | adherence (eg, as randomised analysis), and any statistical      |    |
| 7  | missing data           |      | methods to handle missing data (eg, multiple imputation)         |    |
| 8  |                        |      |                                                                  |    |
| 9  |                        |      |                                                                  |    |
| 10 | Data monitoring:       | #21a | Composition of data monitoring committee (DMC); summary          | 15 |
| 11 | formal committee       |      | of its role and reporting structure; statement of whether it is  |    |
| 12 |                        |      | independent from the sponsor and competing interests; and        |    |
| 13 |                        |      | reference to where further details about its charter can be      |    |
| 14 |                        |      | found, if not in the protocol. Alternatively, an explanation of  |    |
| 15 |                        |      | why a DMC is not needed                                          |    |
| 16 |                        |      |                                                                  |    |
| 17 |                        |      |                                                                  |    |
| 18 |                        |      |                                                                  |    |
| 19 |                        |      |                                                                  |    |
| 20 | Data monitoring:       | #21b | Description of any interim analyses and stopping guidelines,     | NA |
| 21 | interim analysis       |      | including who will have access to these interim results and      |    |
| 22 |                        |      | make the final decision to terminate the trial                   |    |
| 23 |                        |      |                                                                  |    |
| 24 |                        |      |                                                                  |    |
| 25 |                        |      |                                                                  |    |
| 26 | Harms                  | #22  | Plans for collecting, assessing, reporting, and managing         | 15 |
| 27 |                        |      | solicited and spontaneously reported adverse events and          |    |
| 28 |                        |      | other unintended effects of trial interventions or trial conduct |    |
| 29 |                        |      |                                                                  |    |
| 30 |                        |      |                                                                  |    |
| 31 |                        |      |                                                                  |    |
| 32 | Auditing               | #23  | Frequency and procedures for auditing trial conduct, if any,     | 15 |
| 33 |                        |      | and whether the process will be independent from                 |    |
| 34 |                        |      | investigators and the sponsor                                    |    |
| 35 |                        |      |                                                                  |    |
| 36 |                        |      |                                                                  |    |
| 37 | Research ethics        | #24  | Plans for seeking research ethics committee / institutional      | P1 |
| 38 | approval               |      | review board (REC / IRB) approval                                |    |
| 39 |                        |      |                                                                  |    |
| 40 |                        |      |                                                                  |    |
| 41 | Protocol               | #25  | Plans for communicating important protocol modifications         | 14 |
| 42 | amendments             |      | (eg, changes to eligibility criteria, outcomes, analyses) to     |    |
| 43 |                        |      | relevant parties (eg, investigators, REC / IRBs, trial           |    |
| 44 |                        |      | participants, trial registries, journals, regulators)            |    |
| 45 |                        |      |                                                                  |    |
| 46 |                        |      |                                                                  |    |
| 47 |                        |      |                                                                  |    |
| 48 | Consent or assent      | #26a | Who will obtain informed consent or assent from potential        | 19 |
| 49 |                        |      | trial participants or authorised surrogates, and how (see        |    |
| 50 |                        |      | Item 32)                                                         |    |
| 51 |                        |      |                                                                  |    |
| 52 |                        |      |                                                                  |    |
| 53 |                        |      |                                                                  |    |
| 54 | Consent or assent:     | #26b | Additional consent provisions for collection and use of          | NA |
| 55 | ancillary studies      |      | participant data and biological specimens in ancillary           |    |
| 56 |                        |      | studies, if applicable                                           |    |
| 57 |                        |      |                                                                  |    |
| 58 |                        |      |                                                                  |    |
| 59 |                        |      |                                                                  |    |
| 60 |                        |      |                                                                  |    |



|    |                       |      |                                                                 |    |
|----|-----------------------|------|-----------------------------------------------------------------|----|
| 1  | Confidentiality       | #27  | How personal information about potential and enrolled           | 15 |
| 2  |                       |      | participants will be collected, shared, and maintained in       |    |
| 3  |                       |      | order to protect confidentiality before, during, and after the  |    |
| 4  |                       |      | trial                                                           |    |
| 5  |                       |      |                                                                 |    |
| 6  |                       |      |                                                                 |    |
| 7  |                       |      |                                                                 |    |
| 8  | Declaration of        | #28  | Financial and other competing interests for principal           | 18 |
| 9  | interests             |      | investigators for the overall trial and each study site         |    |
| 10 |                       |      |                                                                 |    |
| 11 |                       |      |                                                                 |    |
| 12 | Data access           | #29  | Statement of who will have access to the final trial dataset,   | 15 |
| 13 |                       |      | and disclosure of contractual agreements that limit such        |    |
| 14 |                       |      | access for investigators                                        |    |
| 15 |                       |      |                                                                 |    |
| 16 |                       |      |                                                                 |    |
| 17 | Ancillary and post    | #30  | Provisions, if any, for ancillary and post-trial care, and for  | 15 |
| 18 | trial care            |      | compensation to those who suffer harm from trial                |    |
| 19 |                       |      | participation                                                   |    |
| 20 |                       |      |                                                                 |    |
| 21 |                       |      |                                                                 |    |
| 22 |                       |      |                                                                 |    |
| 23 | Dissemination policy: | #31a | Plans for investigators and sponsor to communicate trial        | 16 |
| 24 | trial results         |      | results to participants, healthcare professionals, the public,  |    |
| 25 |                       |      | and other relevant groups (eg, via publication, reporting in    |    |
| 26 |                       |      | results databases, or other data sharing arrangements),         |    |
| 27 |                       |      | including any publication restrictions                          |    |
| 28 |                       |      |                                                                 |    |
| 29 |                       |      |                                                                 |    |
| 30 |                       |      |                                                                 |    |
| 31 |                       |      |                                                                 |    |
| 32 | Dissemination policy: | #31b | Authorship eligibility guidelines and any intended use of       | NA |
| 33 | authorship            |      | professional writers                                            |    |
| 34 |                       |      |                                                                 |    |
| 35 |                       |      |                                                                 |    |
| 36 | Dissemination policy: | #31c | Plans, if any, for granting public access to the full protocol, | NA |
| 37 | reproducible          |      | participant-level dataset, and statistical code                 |    |
| 38 | research              |      |                                                                 |    |
| 39 |                       |      |                                                                 |    |
| 40 |                       |      |                                                                 |    |
| 41 | Informed consent      | #32  | Model consent form and other related documentation given        | NA |
| 42 | materials             |      | to participants and authorised surrogates                       |    |
| 43 |                       |      |                                                                 |    |
| 44 |                       |      |                                                                 |    |
| 45 | Biological specimens  | #33  | Plans for collection, laboratory evaluation, and storage of     | NA |
| 46 |                       |      | biological specimens for genetic or molecular analysis in the   |    |
| 47 |                       |      | current trial and for future use in ancillary studies, if       |    |
| 48 |                       |      | applicable                                                      |    |
| 49 |                       |      |                                                                 |    |
| 50 |                       |      |                                                                 |    |
| 51 |                       |      |                                                                 |    |

The SPIRIT checklist is distributed under the terms of the Creative Commons Attribution License CC-BY-ND 3.0. This checklist was completed on 19. June 2018 using <http://www.goodreports.org/>, a tool made by the [EQUATOR Network](#) in collaboration with [Penelope.ai](#)

# BMJ Open

## Gut-Directed Hypnotherapy Versus Standard Medical Care for Nausea in Children with Functional Nausea or Functional Dyspepsia: Protocol of a Multi-Center Randomized Trial.

|                                 |                                                                                                                                                                                                                                                                                                                                                                                                                                                                                                                                                                                                                                                                                                                                                                                                                                                                                                                                                                                                                                                                                                                                                                                |
|---------------------------------|--------------------------------------------------------------------------------------------------------------------------------------------------------------------------------------------------------------------------------------------------------------------------------------------------------------------------------------------------------------------------------------------------------------------------------------------------------------------------------------------------------------------------------------------------------------------------------------------------------------------------------------------------------------------------------------------------------------------------------------------------------------------------------------------------------------------------------------------------------------------------------------------------------------------------------------------------------------------------------------------------------------------------------------------------------------------------------------------------------------------------------------------------------------------------------|
| Journal:                        | <i>BMJ Open</i>                                                                                                                                                                                                                                                                                                                                                                                                                                                                                                                                                                                                                                                                                                                                                                                                                                                                                                                                                                                                                                                                                                                                                                |
| Manuscript ID                   | bmjopen-2018-024903.R1                                                                                                                                                                                                                                                                                                                                                                                                                                                                                                                                                                                                                                                                                                                                                                                                                                                                                                                                                                                                                                                                                                                                                         |
| Article Type:                   | Protocol                                                                                                                                                                                                                                                                                                                                                                                                                                                                                                                                                                                                                                                                                                                                                                                                                                                                                                                                                                                                                                                                                                                                                                       |
| Date Submitted by the Author:   | 21-Nov-2018                                                                                                                                                                                                                                                                                                                                                                                                                                                                                                                                                                                                                                                                                                                                                                                                                                                                                                                                                                                                                                                                                                                                                                    |
| Complete List of Authors:       | Browne, Pamela; Amsterdam UMC, Department of Pediatric Gastroenterology and Nutrition<br>den Hollander, Bibiche; Amsterdam UMC, Department of Pediatric Gastroenterology and Nutrition<br>Speksnijder, Esther; Amsterdam UMC, Department of Pediatric Gastroenterology and Nutrition<br>van Wering, Herbert; Amphia Ziekenhuis, Department of Pediatrics<br>Tjon a ten, Walther; Maxima Medical Center, Department of Pediatrics<br>George, Elvira; Northwest Clinics, Department of Pediatrics<br>Groeneweg, Michael; Maasstad Ziekenhuis, Department of Pediatrics<br>Bevers, Nanja; Zuyderland Medical Center, Department of Pediatrics<br>Wessels, Margreet; Rijnstate Hospital, Department of Pediatrics<br>van den Berg, Maartje; Haaglanden Medical Center, Department of Pediatrics<br>Goede, Joery; Spaarne Hospital, Department of Pediatrics<br>Teklenburg, Sarah; Isala Clinics, Department of Pediatrics<br>Frankenhuis, Carla; Amsterdam UMC, Department of Pediatric Gastroenterology and Nutrition<br>Benninga, Marc; Amsterdam UMC, Department of Pediatric Gastroenterology and Nutrition<br>Vlieger, Arine; St. Antonius Hospital, Department of Pediatrics |
| <b>Primary Subject Heading</b>: | Paediatrics                                                                                                                                                                                                                                                                                                                                                                                                                                                                                                                                                                                                                                                                                                                                                                                                                                                                                                                                                                                                                                                                                                                                                                    |
| Secondary Subject Heading:      | Gastroenterology and hepatology                                                                                                                                                                                                                                                                                                                                                                                                                                                                                                                                                                                                                                                                                                                                                                                                                                                                                                                                                                                                                                                                                                                                                |
| Keywords:                       | Hypnotherapy, Functional Nausea, Functional Dyspepsia, Children, Adolescents                                                                                                                                                                                                                                                                                                                                                                                                                                                                                                                                                                                                                                                                                                                                                                                                                                                                                                                                                                                                                                                                                                   |
|                                 |                                                                                                                                                                                                                                                                                                                                                                                                                                                                                                                                                                                                                                                                                                                                                                                                                                                                                                                                                                                                                                                                                                                                                                                |

SCHOLARONE™  
Manuscripts

21 November 2019. V2.

1  
2  
3 1 **Gut-Directed Hypnotherapy Versus Standard Medical Care for Nausea in Children with**  
4 **Functional Nausea or Functional Dyspepsia: Protocol of a Multi-Center Randomized Trial.**  
5 2  
6  
7 3

8  
9 4 **Author names and affiliations**

10 5 Pamela D. Browne<sup>1</sup>, Bibiche den Hollander<sup>1</sup>, Esther Speksnijder<sup>1</sup>, Herbert van Wering<sup>2</sup>,  
11 6 Walther Tjon A Ten<sup>3</sup>, Elvira K. George<sup>4</sup>, Michael Groeneweg<sup>5</sup>, Nanja Bevers<sup>6</sup>, Margreet  
12 7 Wessels<sup>7</sup>, Maartje van den Berg<sup>8</sup>, Joery Goede<sup>9</sup>, Sarah Teklenburg<sup>10</sup>, Carla Frankenhuys<sup>1</sup>,  
13 8 Marc A. Benninga<sup>1</sup>, Arine M. Vlieger<sup>11</sup>

14  
15  
16  
17  
18 9 **Corresponding author**

19  
20 10 Pamela D. Browne; [P.D.Browne@amc.uva.nl](mailto:P.D.Browne@amc.uva.nl)

21  
22 11 **Present/permanent address:** Emma Children's Hospital, Amsterdam UMC, University of  
23 12 Amsterdam, Pediatric Gastroenterology, Meibergdreef 9 (room C2-312), 1105 AZ  
24 13 Amsterdam, The Netherlands

- 25  
26  
27  
28 14 1. Emma Children's Hospital, Amsterdam UMC, University of Amsterdam, Pediatric  
29 15 Gastroenterology, Amsterdam, The Netherlands  
30 16 2. Department of Pediatrics, Amphia Hospital, Breda, the Netherlands  
31 17 3. Department of Pediatrics, Maxima Medical Center, Veldhoven, the Netherlands  
32 18 4. Department of Pediatrics, Northwest Clinics, Alkmaar, The Netherlands  
33 19 5. Department of Pediatrics, Maastad Hospital, Rotterdam, The Netherlands  
34 20 6. Department of Pediatrics, Zuyderland Medical Center, Heerlen, The Netherlands  
35 21 7. Department of Pediatrics, Rijnstate Hospital, Arnhem, The Netherlands  
36 22 8. Department of Pediatrics, Haaglanden Medical Center, Den Haag, The Netherlands  
37 23 9. Department of Pediatrics, Spaarne Hospital, Hoofddorp, The Netherlands  
38 24 10. Department of Pediatrics, Isala Clinics, Zwolle, The Netherlands  
39 25 11. Department of Pediatrics, St. Antonius Hospital, Nieuwegein, The Netherlands  
40  
41  
42  
43  
44  
45  
46  
47  
48  
49  
50  
51  
52  
53  
54  
55  
56  
57  
58  
59  
60

21 November 2019. V2.

1  
2  
3 31 **Abstract**

4  
5 32 *Introduction:* The treatment of chronic functional nausea or nausea due to functional  
6  
7 33 dyspepsia in children is generally symptomatic. Moreover, these disorders pose a risk for  
8  
9 34 worse psychosocial and health outcomes in children. Hypnotherapy, by its ability to  
10  
11 35 positively influence gastrointestinal and psychosocial functioning, may be an effective  
12  
13 36 treatment for chronic nausea.

14 37 *Methods and analysis:* To test efficacy, this multi-center, parallel, randomized controlled,  
15  
16 38 open label trial evaluates whether gut-directed hypnotherapy (HT) is superior to standard  
17  
18 39 medical care (SMT) for reducing nausea. The study will be conducted at eleven academic and  
19  
20 40 non-academic hospitals across the Netherlands. A total of hundred children (8-18 years),  
21  
22 41 fulfilling the Rome IV criteria for chronic idiopathic nausea or functional dyspepsia with  
23  
24 42 prominent nausea, will be randomly allocated (1:1) to receive HT or SMT. Children allocated  
25  
26 43 to the HT group will receive six sessions of HT during three months, while children allocated  
27  
28 44 to the SMT group will receive six sessions of SMT + supportive therapy during the same  
29  
30 45 period. The primary outcome will be the difference in the proportion of children with at  
31  
32 46 least 50% reduction of nausea, compared to baseline at twelve months follow-up. Secondary  
33  
34 47 outcomes include the changes in abdominal pain, dyspeptic symptoms, quality of life,  
35  
36 48 anxiety, depression, school absences, parental absence of work, health-care costs, and  
37  
38 49 adequate relief of symptoms, measured directly after treatment, six and twelve months  
39  
40 50 follow-up. If HT proves effective for reducing nausea, it may become a new treatment  
41  
42 51 strategy to treat children with chronic functional nausea or functional dyspepsia with  
43  
44 52 prominent nausea.

45 53 *Ethics and dissemination:* Results of the study will be publically disclosed to the public,  
46  
47 54 without any restrictions, in peer-reviewed journal and international conferences. The study  
48  
49 55 is approved by the Medical Research Ethics Committees United (MEC-U) in the Netherlands.

50  
51 56  
52 57 **Registration details:** Dutch trial registration number is NTR5814. Registered on 7 June 2016.

53 58 <http://www.trialregister.nl/trialreg/admin/rctview.asp?TC=5814>

54 59 **Keywords:** Hypnotherapy, Functional Nausea, Functional Dyspepsia, Children, Adolescents

55 60 **Words:** 5972

56  
57  
58  
59 61

21 November 2019. V2.

1  
2  
3 **62 Article summary (strengths and limitations)**

- 4  
5 **63** - First study to investigate the effectiveness of hypnotherapy on symptoms of nausea in  
6  
7 **64** children and adolescents, diagnosed with chronic idiopathic nausea or functional dyspepsia.  
8  
9 **65** - A multicenter study with eleven participating academic and non-academic hospitals  
10  
11 **66** recruiting 100 children and adolescents.  
12  
13 **67** - Long-term study follow-up of one year.  
14  
15 **68** - Due to the nature of hypnotherapy, children, parents, and health care providers are not  
16  
17 **69** blinded for the received treatments.

18  
19 **70 1. Introduction**

20  
21 **71** Chronic idiopathic nausea (CIN) and functional dyspepsia (FD) affect approximately 0.5% and  
22  
23 **72** 4.5-7.6% children worldwide [1], respectively, and are associated with substantial physical  
24  
25 **73** and psychosocial distress, school absences and decreased social functioning [2-4]. Moreover,  
26  
27 **74** it has a considerable negative financial impact on health care [5]. According to the Rome IV  
28  
29 **75** criteria, when no evidence of organic disease is found, the disorders are considered  
30  
31 **76** functional. Children meet the Rome IV criteria for CIN when they suffer from chronic nausea  
32  
33 **77** without abdominal pain, when symptoms are not related to meals, and not consistently  
34  
35 **78** associated with vomiting. Children are diagnosed with FD when they have chronic symptoms  
36  
37 **79** of epigastric pain/burning, symptoms of postprandial fullness, and/or early satiation [6].

38  
39 **80** The treatment of CIN and FD with prominent nausea in pediatric patients is mostly  
40  
41 **81** symptomatic and not well defined. Most clinicians individualize the patient's medical  
42  
43 **82** treatment, including prokinetics, anti-emetics, antacids, and herbal products, according to  
44  
45 **83** their symptoms and associated comorbidities [3, 4]. The major disadvantage of this  
46  
47 **84** approach is that this treatment is symptomatic, and thus drugs often need to be used as  
48  
49 **85** long as patients suffer from nausea, which may take years [7, 8]. Hence, there is a need for  
50  
51 **86** additional effective treatments for nausea in children with CIN or FD.

52  
53 **87** Several pathophysiologic mechanisms have been proposed to play a role in the  
54  
55 **88** etiology of CIN and FD, including delayed gastric emptying, impaired gastric motility and/or  
56  
57 **89** abnormal central nervous system processing of gastric stimuli through the gut-brain axis [3].  
58  
59 **90** Additionally, there are indications that psychological factors, including anxiety and stress,  
60  
**91** may increase the severity of nausea through the gut-brain axis [9, 10].

**92** Gut-directed hypnotherapy (HT) may have the potential to reduce symptoms of

21 November 2019. V2.

1  
2  
3 93 nausea in children with CIN or FD. HT is a form of therapy in which a therapist, by using  
4  
5 94 suggestions, can induce a hypnotic state in an individual to positively modify physiological,  
6  
7 95 cognitive, and affective processes, as well as behavior in that individual [11]. It has been  
8  
9 96 shown to be very effective in the treatment of adults and children with functional abdominal  
10  
11 97 pain [12, 13] and children with chemotherapy-induced nausea and vomiting [14]. Therefore  
12  
13 98 we hypothesize that HT, by its ability to influence gut motility [15], psychological well-being  
14  
15 99 [16] and visceral hypersensitivity [17-19], might alleviate symptoms of nausea in children  
16  
17 100 with CIN or FD as well. To date, however, no studies have examined the potential effect of  
18  
19 101 HT in children with CIN or FD.

20 102 The main goal of this multi-center randomized controlled trial is to evaluate the  
21  
22 103 effectiveness of HT in reducing symptoms of nausea in children with CIN or FD. Six sessions  
23  
24 104 of gut-direct HT will be compared with six sessions of SMT plus supportive therapy in 100  
25  
26 105 children with CIN or FD between 8 and 18 years. Additionally, we will investigate the  
27  
28 106 potential influence on abdominal pain, dyspeptic symptoms, quality of life, anxiety,  
29  
30 107 depression, school absences, parental absence of work and health-care costs. We expect  
31  
32 108 that HT will be more effective in reducing symptoms of nausea than standard medical care.  
33  
34 109 Furthermore, we expect that children receiving hypnotherapy will report more relief of  
35  
36 110 symptoms (e.g. less abdominal pain, less dyspeptic symptoms), better quality of life, less  
37  
38 111 symptoms of anxiety and depression, less absence from school, compared to children  
39  
40 112 receiving standard medical care. We also expect that parents of children in the  
41  
42 113 hypnotherapy group will report less parental absences from work and lower health care  
43  
44 114 costs, compared the medical care group.

45

46

47

48

49

50

51

52

53

54

55

56

57

58

59

60

21 November 2019. V2.

## 124 **2. Methods**

### 125 **2.1 Trial design**

126 The present study in children and adolescents is a multi-center randomized controlled trial  
127 (RCT). Hundred children between ages 8 and 18 years with symptoms of nausea and fulfilling  
128 the Rome IV criteria for CIN or FD, diagnosed by their pediatrician, will be enrolled in the  
129 study. After randomization, children will receive either 6 sessions of gut-directed HT during 3  
130 months by a qualified hypnotherapist, or 6 sessions of SMT plus supportive therapy from  
131 their pediatrician during 3 months (see Figure 1). Detailed information on the HT and SMT  
132 interventions can be found under the section '2.5. Intervention'. The additional file 1  
133 presents the Standard Protocol Items: Recommendations for Interventional Trials (SPIRIT)  
134 checklist (see additional File 1).

### 135 **2.2. Patient and Public Involvement**

136 Patients and the public were not involved in the design of the RCT.

### 137 **2.3 Recruitment**

#### 138 *2.3.1 Recruitment procedures*

139 Children and adolescents will be recruited in outpatient pediatric clinics of 1 academic and  
140 10 non-academic hospitals in the Netherlands: Academic Medical Center (Amsterdam),  
141 Amphia Hospital (Breda), Maxima Medical Center (Veldhoven), Northwest Clinics (Alkmaar),  
142 Maastad Hospital (Rotterdam), Zuyderland Medical Center (Heerlen), Rijnstate Hospital,  
143 (Arnhem), Haaglanden Medical Center (Den Haag), Spaarne Hospital (Hoofddorp), Isala  
144 Clinics (Zwolle) and St. Antonius Hospital (Nieuwegein). These centers are located in both  
145 urban and rural areas throughout the Netherlands, serving an ethnically diverse pediatric  
146 population.

#### 148 *2.3.2. Participant screening*

149 All children with symptoms of nausea and fulfilling the Rome IV criteria for CIN or FD, will  
150 undergo blood laboratory testing before inclusion, including complete blood cell count, C-  
151 reactive protein, liver function tests, creatinine, total bilirubin, and for celiac screening,  
152 amylase anti-transglutaminase antibodies and IgA testing. Additionally, urinalysis and stool  
153 analysis for parasites (*Giardia Lamblia*, *Entamoeba Histolytica*) and *Helicobacter pylori*  
154 antigens will be performed. The need for additional diagnostic testing, for example

21 November 2019. V2.

155 endoscopy to rule out eosinophilic esophagitis or 24h pH, will be left to the discretion of the  
156 treating pediatrician or pediatric gastroenterologist. The flow of the study protocol is  
157 presented in Figure 2.

158

## 159 **2.4. Criteria**

### 160 *2.4.1. Inclusion criteria*

161 A total sample of 100 children and adolescents with CIN or FD with symptoms of nausea will  
162 be enrolled in the study. Children and adolescents can participate in this study if they meet  
163 the following inclusion criteria:

- 164 • Age 8 to 18 years at inclusion of the study
- 165 • Diagnosis of CIN or FD, with symptoms of nausea, according to Rome IV criteria  
166 (Hyams et al., 2016)
- 167 • Sufficient knowledge of the Dutch language

### 168 *2.4.2. Exclusion criteria*

169 Children will not be enrolled in the study if they meet the following exclusion criteria:

- 170 • Concomitant organic gastrointestinal disease
- 171 • Simultaneous treatment by another health care professional for symptoms of nausea
- 172 • Previously received hypnotherapy
- 173 • Intellectual disability

## 174 **2.5. Randomization, blinding, and treatment allocation**

175 After obtaining informed consent, children are randomly allocated, by the treating  
176 pediatricians, to one of the two treatment arms: HT, given by a qualified therapist, or SMT,  
177 meaning treatment by the child's pediatrician. A computerized random-number generator  
178 will be used to randomly allocate children on a 1:1 basis with varying block sized of 2, 4 and  
179 6. To ensure allocation concealment, central randomization will be applied and the random  
180 allocation sequence remains concealed from pediatricians enrolling children into the study.  
181 Due to the nature of HT, it is not possible to blind the participating children and health care  
182 professionals involved in the treatment of the participants.

## 183 **2.6. Intervention**

### 184 *2.6.1. Hypnotherapy*



21 November 2019. V2.

1  
2  
3 185 Individual HT consist of 6 sessions of 50-60 minutes, given over a period of 3 months by a  
4  
5 186 qualified hypnotherapist (week 1, 2, 3, 5, 7 and 11). Twelve hypnotherapist affiliated to the  
6  
7 187 recruiting hospitals will offer the HT to children. All hypnotherapists have years of  
8  
9 188 experience in performing HT in children. The hypnotherapists will use an adapted version of  
10  
11 189 our previously used HT protocol [13, 20]. The HT protocol contains exercises focusing on  
12  
13 190 normalization of the gut motility, stress reduction and ego strengthening. The  
14  
15 191 hypnotherapists will be instructed to use the same scripts, but are allowed to adapt the  
16  
17 192 content to the child's needs. The same protocol is used for children of all ages. However, the  
18  
19 193 language used will be adjusted to the child's developmental age.

19 194 In the first session, an introduction to HT will be given to the child and parents, including an  
20  
21 195 explanation of what HT is and how it may help in reducing symptoms of nausea.

22  
23 196 Furthermore, the hypnotherapist will take a full history and children and parents are  
24  
25 197 instructed to not talk about the nausea during the treatment period. The hypnotherapist will  
26  
27 198 then start with a breathing exercise and introduce a progressive relaxation, in which children  
28  
29 199 imagine floating on a big cloud. Positive suggestions to increase the child's belly comfort will  
30  
31 200 also be provided. For instance, the child will be instructed to make hands warm and place  
32  
33 201 both hands on the belly, imagining warmth spreading through their abdomen, and especially  
34  
35 202 the stomach.

36 203 In the second session, the therapist will repeat the exercise on progressive relaxation.

37  
38 204 Additionally, the therapist will introduce an exercise focusing on reduction of anxiety and  
39  
40 205 stress, which is called 'the favorite place exercise'.

41  
42 206 The third session focuses on ego strengthening and a new exercise will be introduced: 'the  
43  
44 207 rainbow planet exercise' for children attending primary school, and 'the air balloon exercise'  
45  
46 208 for children in secondary school. In the first exercise, children choose a personal need from a  
47  
48 209 rainbow that contains different needs, for example a healthy stomach, courage, tranquility,  
49  
50 210 or confidence.

51 211 In the fourth session, children are encouraged to release stress during the 'the beach  
52  
53 212 without worries exercise' and additional ego strengthening suggestions are made.

54 213 The fifth session focuses on reduction of anxiety, stress and ego strengthening, as well as  
55  
56 214 improved functioning of the digestive system. For the digestive system, children visualize a  
57  
58 215 well working digestive system with food sliding through the stomach and bowel in a  
59  
60 216 comfortable way.

21 November 2019. V2.

1  
2  
3 217 In the sixth session, the previous sessions will be evaluated, remaining gastro-intestinal  
4  
5 218 problems may be addressed and preceding exercises may be repeated, if requested by  
6  
7 219 children. If no improvement has taken place, an exercise will be introduced in which the  
8  
9 220 child is instructed to look inside the stomach to see 'what the stomach needs'.

10 221 After the first session, all children will receive a CD containing standard scripts of the  
11  
12 222 exercises used during the sessions. The hypnotherapist will advise children to self-practice  
13  
14 223 these exercises on a daily basis. Additionally, the therapist will encourage children to  
15  
16 224 practice breathing exercises a few time a day.

17  
18 225

### 19 226 *2.6.2. Standard medical care + supportive therapy*

20 227 In the SMT group, children will visit their treating pediatrician 6 times over a 3-month  
21  
22 228 period. All pediatricians will be instructed to use the same protocol for treating symptoms of  
23  
24 229 nausea. The protocol consists of a stepwise approach. In the first step, children and parents  
25  
26 230 will be educated about CIN and FD, reassured that there is no structural organic underlying  
27  
28 231 disease present, and dietary and lifestyle advices will be provided. Children will be advised to  
29  
30 232 adhere to national practical guidelines for healthy eating by the Netherlands Nutrition  
31  
32 233 Centre. Children will be recommended to avoid products containing caffeine, strong spices,  
33  
34 234 citrus fruits, onions, fatty foods, and if applicable, to stop smoking. Additionally, the  
35  
36 235 pediatrician will explore, together with children and parents, possible connections between  
37  
38 236 stressful moments, emotional problems and complaints of nausea. If connections are  
39  
40 237 present, the pediatrician will encourage children and parents to improve coping strategies to  
41  
42 238 effectively manage stress, to reduce external stressors, and to ensure an optimal  
43  
44 239 environment with sufficient relaxation. Children will also be encouraged to continue their  
45  
46 240 normal daily and sport activities and to go to school, to prevent or decrease avoidance  
47  
48 241 behavior.

49 242 In case this does not result in adequate relief of symptoms, the pediatrician continues with  
50  
51 243 the second step. In the second step, proton pump inhibitors (PPI) in combination with  
52  
53 244 domperidone will be prescribed. If this treatment is not effective in reducing symptoms the  
54  
55 245 pediatrician continues with the third step, which includes the prescription of ondansetron  
56  
57 246 and (dis)continuation of PPIs. If again no adequate improvement occurs, in the fourth step,  
58  
59 247 Iberogast will be started for children >12 years. If children do not respond to Iberogast (>12  
60  
248 years) or ondansetron (<12 years), the pediatrician will continue with the fifth step and

21 November 2019. V2.

1  
2  
3 249 prescribe erythromycin. Finally, if previous treatment did not prove to be successful in  
4  
5 250 reducing symptoms, cyproheptadine will be prescribed.  
6  
7 251 The pediatrician will evaluate each step after two to four weeks. All dosages, except for  
8  
9 252 Iberogast, will be prescribed according to [www.kinderformularium.nl](http://www.kinderformularium.nl) (Dutch medical  
10  
11 253 guideline for pediatricians).  
12  
13 254 In addition to the medical treatment, children will receive 6 half hour sessions of supportive  
14  
15 255 therapy given by the treating pediatrician. In these sessions, the symptom progression will  
16  
17 256 be discussed and patient education will be provided. Moreover, exploration of potential  
18  
19 257 contributing triggers (i.e. dietary product, emotional problems and stressful events) will be  
20  
21 258 evaluated together with children and parents. Supportive therapy is added to correct for the  
22  
23 259 patient-therapist time in the HT group.

24  
25 260

### 26 261 *2.6.3. Co-interventions*

27 262 After 6 sessions of HT, children visit their pediatrician to evaluate the effects of HT and, if  
28  
29 263 considered necessary, to receive additional medical care.

30  
31 264

## 32 265 **2.7. Outcomes**

### 33 266 *2.7.1. Primary outcome*

34 267 The primary outcome of the RCT is the proportion of patients with at least 50% reduction of  
35  
36 268 their symptoms of nausea compare to baseline at 12 months follow-up. Children and  
37  
38 269 adolescents report symptoms of nausea at home by using the 7-day diary. To promote  
39  
40 270 retention and complete follow-up, children and parents will be reminded on regular basis,  
41  
42 271 via email and phone calls, to fill in the 7-day diary and other questionnaires.  
43  
44 272

45  
46 273

### 47 274 *7-day diary*

48  
49 275 The 7-day diary is used by children and adolescents to score the severity, incidence and  
50  
51 276 frequency of symptoms of nausea, every day during 7 consecutive days [13, 21, 22].

52  
53 277 The *severity* of nausea is assessed by the 'nausea face' analog scale, a validated tool in the  
54  
55 278 pediatric population [23]. Children rate their degree of nausea on a day using 6-faces: face 0  
56  
57 279 indicates no nausea and face 6 indicates nausea as bad as it can be imaged. Scores on the  
58  
59 280 'nausea face' scale are transported to a daily 0-10 score. Face 0, no nausea, is scored as 0,  
60  
face 1 is scored as 2, face 2 is scored as 4, face 3 is scored as 6, face 4 is scored as 8 and face

21 November 2019. V2.

1  
2  
3 281 5 is scored as 10 [23]. The 'severity of nausea' (SON) score is calculated by summing up the  
4  
5 282 scores of seven days, giving a maximum of score of 70 [13, 20- 22].

6  
7 283 The *incidence* of nausea is assessed using the 'nausea incidence' scale (NIS), adapted from  
8  
9 284 the 5-point dyspepsia Likert scale (Canan, 2011; De Luca et al., 2004). It measures the  
10  
11 285 incidence of symptoms during a day, where score 0 for no nausea, score 1 for 1-2 times a  
12  
13 286 day, score 2 for 3-5 times a day, score 3 for intermittent complaints and score 4 for  
14  
15 287 complaints were always present. The total sum of the scores of seven days indicates the  
16  
17 288 severity of the nausea during a week, as experienced by the child. The maximum total score  
18  
19 289 is 28 [13, 20- 22].

20 290 The *frequency* of symptoms of nausea is recorded in minutes/hours per day and is scored by  
21  
22 291 children as 0 when there was no nausea, 1 if children had <10 minutes of nausea, 2 for 10-30  
23  
24 292 minutes of nausea, 3 for 30 minutes-2 hours of nausea, 4 for 2-4 hours of nausea and 5 if the  
25  
26 293 nausea lasts >4 hours a day. The 'nausea frequency score' (NFS) is calculated by summing  
27  
28 294 the scores of the seven days, with a maximum of 35 [13, 21, 22]. Treatment success is  
29  
30 295 defined as at least 50% reduction in the SON, NIS and NFS.

31 296

### 32 297 *2.7.2. Secondary outcomes*

33  
34 298 In addition to the primary outcomes, the present study investigates secondary outcomes,  
35  
36 299 including abdominal pain, dyspeptic symptoms, health related quality of life, anxiety,  
37  
38 300 depression, school absences, parental absence of work and health-care costs. Secondary  
39  
40 301 outcomes are measured at 6 weeks and 3 months after treatment, and at 6 and 12 months  
41  
42 302 follow-up after the end of treatment (Figure 1).

43 303

#### 44 304 *Abdominal pain*

45  
46 305 A 7-day diary is used to assess the severity and frequency of abdominal pain, every day  
47  
48 306 during 7 consecutive days. It comprises of two subscales: the abdominal pain intensity  
49  
50 307 subscale (APIS) and abdominal pain frequency subscale (APFS). The APIS will be scored using  
51  
52 308 an affective facial scale ranging with face 0 indicating 'no pain at all' to face 5 indicating 'the  
53  
54 309 most severe pain'. No abdominal pain is scored as 0, faces 1 - 2 are scored as 1, faces 3 - 4  
55  
56 310 are scored as 2 and face 5 is scored as 3. The scores of seven days are summed up, with a  
57  
58 311 maximum score of 21 [13, 20- 22]. The APFS is recorded in minutes/hours of abdominal pain  
59  
60 312 per day, with score 0 indicating no pain, score 1 if children had <10 minutes of pain, 2 for 10-

21 November 2019. V2.

313 30 minutes of pain, 3 for 30 minutes-2 hours of pain, 4 for 2-4 hours of pain and 5 >4 hours  
314 of pain. The scores the APFS are summed up, giving a pain frequency score of maximum 35  
315 [13, 20- 22].

### 316 *Dyspeptic symptoms*

317 Severity and incidence of dyspeptic symptoms is measured using the 5-point dyspepsia  
318 Likert scale, previously used in the pediatric population [24, 25]. The dyspepsia Likert scale  
319 consists of 8 gastrointestinal dyspeptic symptoms: epigastric pain, upper abdominal  
320 discomfort, retrosternal pyrosis, sour-bitter taste, halitosis, belching, nausea, and early  
321 satiety. Children score the *severity* of each symptoms during the previous two weeks on a 5-  
322 point Likert scale: score 1 'no complaints at all', score 2 'little complaints', score 3 'moderate  
323 complaints', score 4 'quite a lot of complaints' and 5 'serious complaints' [24]. A higher sum  
324 score indicates more severe dyspeptic complaints (SDC score), with a maximum of 40.  
325 Children report on the *incidence* of each of the symptoms during the previous two weeks by  
326 scoring: 1 'no complaints', 2 '1-2 times a week', 3 '3-5 times a week', 4 'intermittent  
327 complaints' and 5 'complaints were always present' [24]. The dyspepsia severity score (DSS)  
328 is calculated by summing up the scores, giving a maximum value of 40.

### 329 *Health related quality of life*

330 The KIDSCREEN-52 questionnaire measures health related quality of life (QoL) in children  
331 and adolescents. The questionnaire has been shown a valid tool in the Dutch pediatric  
332 population [26, 27]. The KIDSCREEN-52 consists of items on ten dimensions related to QoL  
333 on a 5-point Likert scale: moods and emotions, self-perception, relations with parents and  
334 home life, autonomy, physical well-being, psychological well-being, school environment,  
335 social support and peers, social acceptance (bullying) and financial resources. For each  
336 individual dimension, Rasch scores are computed from the individual items. These are then  
337 transformed into T-values: higher T-values indicate a better health related QoL and well-  
338 being.

### 339 *Anxiety and depression*

340 Anxiety and depression are evaluated using the Revised Anxiety and Depression Scale-short  
341 version (RCADS-25). This questionnaire has been previously validated in the Dutch pediatric  
342 population [28]. The RCADS-25 consists of five subscales measuring symptoms of generalized  
343 anxiety disorders, separation anxiety disorder, social phobia, panic disorder and major  
344 depressive disorder. Each subscale contains five items and scales range from 0 (never) to 3

21 November 2019. V2.

1  
2  
3 345 (always). The total score on anxiety or depression is the sum of the items measuring  
4  
5 346 symptoms of anxiety and depressive symptoms, respectively. Higher scores indicate more  
6  
7 347 symptoms of anxiety or depression.

8  
9 348 *Cost effectiveness/cost utility*

10 349 The Health Utility Index Mark 3 (HUI) will be used in the cost-utility and cost-effectiveness  
11  
12 350 analysis. The HUI-3 is a multi-attribute utility measure of health status in children as  
13  
14 351 reported by parents. Proxy measurements of parents for health status of children are  
15  
16 352 justifiable, as some children may be too young to provide reliable and valid information  
17  
18 353 about their own health status [29-31]. The questionnaire consists of eight dimensions of  
19  
20 354 health status: vision, hearing, speech, ambulation, dexterity, emotion, cognition, and pain,  
21  
22 355 with scales varying from highly impaired to normal. Health utilities of 1 indicate perfect  
23  
24 356 health, whereas 0 indicates death. The Quality adjusted life years (QALY) will be calculated  
25  
26 357 by multiplying the sum of the utility of health states by the time in between measurements.

27 358 *Work absenteeism by parents and school absenteeism by children*

28  
29 359 An adapted version of the Dutch Health and Labor Questionnaire (HLQ) will be used to  
30  
31 360 measure work absenteeism by parents, school absenteeism by children, and indirect costs of  
32  
33 361 health care utilization [32]. This adapted version contains three items. Parents indicate  
34  
35 362 whether their child has been absent from school due to complaints of nausea, and if yes, the  
36  
37 363 amount of hours per week. For work absenteeism by parents, parents indicate the number  
38  
39 364 of hours they worked less on average because of their child's symptoms of nausea. For the  
40  
41 365 indirect costs of health care utilization, parents indicate additional costs they had due to  
42  
43 366 symptoms of nausea of their child over the past four weeks.

44 367 *Somatization*

45 368 The Children's Somatization Inventory (CSI) measures the extent to which children and  
46  
47 369 adolescents experience somatic symptoms. The questionnaire has been shown a valid and  
48  
49 370 reliable self-report instrument in the pediatric population [33]. The CSI consists of 35 items  
50  
51 371 and on a 5-point Likert scale (0 = not at all to 4 = a whole lot) and children rate the extent to  
52  
53 372 which they experienced somatic symptoms in the previous two weeks. The total score is  
54  
55 373 calculated by summing up the 35 items, with higher scores indicating higher intensity of  
56  
57 374 somatic complaints experienced by the child.

58 375 In order to calculate a separate CSI-score for non-gastrointestinal (GI) symptoms, 7 items on  
59  
60 376 GI-symptoms (nausea, constipation, diarrhea, epigastric and abdominal pain, vomiting and

21 November 2019. V2.

1  
2  
3 377 bloating) are left out. The total score of somatic symptoms without GI-symptoms is  
4  
5 378 calculated by summing up the scores of non-GI symptoms, with higher scores reflecting  
6  
7 379 higher intensity of non-GI somatic complaints.

### 8 380 *Adequate relief*

9  
10 381 Parents and children will be asked whether adequate relief of symptoms of nausea has  
11  
12 382 occurred, using a dichotomous scale (yes/no). Adequate relief has been previously used as  
13  
14 383 an endpoint in clinical trials assessing hypnotherapy in children and adolescents [20] and has  
15  
16 384 been shown a valid outcome measure for functional gastrointestinal disorders [34].  
17

18 385

## 19 386 **2.8. Sample size calculation**

20  
21 387 The primary outcome of the RCT is the proportion of patients with at least 50% reduction of  
22  
23 388 their symptoms of nausea compare to baseline at 12 months follow-up. Based on our pilot  
24  
25 389 study (Vlieger, A. M. "A pilot-study of hypnotherapy as a treatment for functional nausea in  
26  
27 390 children") and the success percentages in studies using hypnotherapy in adults with  
28  
29 391 functional dyspepsia [35] and in pediatric cancer patients [14] , we expect that 80% of the  
30  
31 392 children in the hypnotherapy group will have >50% reduction of their symptoms of nausea  
32  
33 393 after one year. In the standard medical care group, we anticipate that 50% of the children  
34  
35 394 will have >50% reduction of their symptoms of nausea after one year. Based on these  
36  
37 395 expected proportions, 45 children per group will be needed to achieve a power of 80% with  
38  
39 396 a one-sided significance level of 5%. Accounting for a 10% dropout, 100 children will be  
40  
41 397 included in this study. If a child is prematurely withdrawn from the study, he/she will not be  
42  
43 398 replaced; data will be analyzed according to the intention to treat analysis.

## 44 399 **2.9. Statistical analysis**

### 45 400 *2.9.1. Primary outcome*

46  
47 401 Outcomes will be analyzed according to the intention to treat (ITT) analysis. For the primary  
48  
49 402 outcome, the Chi-square test will be used to compare the proportions of patients with >50%  
50  
51 403 reduction of symptoms of nausea (i.e. severity, incidence and frequency of nausea) after 12  
52  
53 404 months follow-up between the two groups (HT versus SMT). For all analysis, the significance  
54  
55 405 level for statistical analysis is set at  $\alpha = 0.05$ . Multiple imputation will be applied to deal with  
56  
57 406 cases of missing data.  
58

59 407  
60

21 November 2019. V2.

### 408 2.9.2. Secondary outcomes

409 For the secondary outcomes, including the potential influence on abdominal pain, dyspeptic  
410 symptoms, health related quality of life, anxiety, depression, work absenteeism by parents,  
411 school absenteeism by children, somatization and adequate relief, the Student's *t*-test will  
412 be used for means of normally distributed data, the Mann–Whitney U test for  
413 nonparametric data and the Chi-square test to compare proportions. To calculate the cost-  
414 effectiveness, cost-utility and cost-effectiveness ratios will be calculated for the extra costs  
415 per child with >50% reduction of symptoms of nausea and the extra costs per QALY.  
416 As secondary analysis, the proportion of patients with >50% reduction of their nausea  
417 (severity, incidence and frequency) after treatment, 6 months and 12 months follow up will  
418 be compared between groups using multivariate logistic regression correcting for age and  
419 center.

420

### 421 3. Amendments

422 Prior to implementation, amendments will be examined and approved by the METC. The  
423 sponsor will only record non-substantial amendments.

### 424 4. Data monitoring

425 Hypnotherapy is usually well tolerated in children, without significant side effects. In our  
426 previous trials only a minority of children reported some dizziness, mostly during or directly  
427 after the end of the first session [13, 21]. In case children experience dizziness, they will be  
428 advised to execute the remaining sessions in a sitting position instead of a supine position.  
429 Children assigned to the SMT group will receive standard medical treatment, including drugs  
430 that have been either registered for children, or of which side effects are limited and well  
431 known. For these reasons, no Data Monitoring Safety Board will be established.  
432 Study auditing will be accomplished by periodic visits to the participating centers, and by  
433 email and telephone contact with local investigators, to ensure the study protocol is being  
434 complied with and to discuss any problems that might have arisen.

### 435 5. Potential harms

436 In accordance to the legal requirements in the Netherlands (article 10, subsection 1, WMO),  
437 the investigator will inform the subjects and the reviewing accredited METC if harmful  
438 events occur. When there are indications that the disadvantage of participation may be



21 November 2019. V2.

1  
2  
3 439 significantly greater than was described in the research proposal, the study will be  
4  
5 440 suspended pending further review by the accredited METC. However, the study will not be  
6  
7 441 suspended if it would jeopardize participating children's health.

#### 9 442 **6. Ancillary and post-trial care**

11 443 In accordance with Article 7 WMO and the Measure regarding Compulsory Insurance for  
12  
13 444 Clinical Research in Humans of 23th June 200<sup>th</sup>, the sponsor has liability insurance for any  
14  
15 445 damage to children which might emerge from study participation [36].

#### 17 446 **7. Data storage**

19 447 The related information on paper, including 7-day diaries, will be securely stored in a locked  
20  
21 448 file cabinet with limited access. Online questionnaire data will be securely stored using the  
22  
23 449 University's password-protected access systems. Only the main researchers will be given full  
24  
25 450 access to the questionnaire data. All records that contain names will be saved in one file,  
26  
27 451 which will be password protected and only accessible to the main researchers.

#### 30 453 **8. Dissemination policy**

32 454 The researchers will communicate trial results to the public, health care providers, and other  
33  
34 455 relevant groups via reports, and by publishing in peer-reviewed journals. Negative as well as  
35  
36 456 positive results will be published. The results will be shared with participating children and  
37  
38 457 parents after completion of the trial. All authors who provided substantial contributions to  
39  
40 458 the conduct, interpretation, and reporting of the results will be granted authorship on the  
41  
42 459 final trial report.

#### 45 461 **9. Discussion and conclusion**

47 462 Chronic nausea is a highly disabling symptom for children with CIN or FD, and poses a risk for  
48  
49 463 negative health outcomes and decreased psychosocial functioning [2-4]. To date large  
50  
51 464 randomized placebo controlled trials evaluating the effect of any drug in children with either  
52  
53 465 CIN or FD are lacking [37]. Current medical treatment is experienced based, however these  
54  
55 466 treatments are symptomatic and often used for months or years [7, 8]. For these reasons,  
56  
57 467 new effective treatment options to reduce nausea in children with CIN or FD are warranted.

58 468  
59 469 There are indications that HT can decrease symptoms of functional nausea and dyspepsia in

21 November 2019. V2.

1  
2  
3 470 adults [35], and functional abdominal pain (FAP) [13] and chemotherapy induced nausea in  
4  
5 471 children [14]. Calvert et al. (2002) found that adult patients with FD receiving 12 sessions of  
6  
7 472 HT had significantly less dyspeptic symptoms (59%, N=26) compared to patients receiving  
8  
9 473 medical treatment (33%, N=29) ( $p=0.02$ ) [35]. These beneficial effects were maintained for  
10  
11 474 more than a year: 56 weeks after the first treatment, 73% of the patients in the HT group  
12  
13 475 reported symptom improvement compared to 43% in the medical treatment group ( $p<0.01$ ).  
14  
15 476 In children with FAP, Vlieger (2007) found that HT was highly superior compared to standard  
16  
17 477 medical care to reduce abdominal pain. At one year follow-up, 85% of the children in the HT  
18  
19 478 group (N=26) were in clinical remission compared to 25% of the children in the SMT group  
20  
21 479 (N=24) ( $p<0.001$ ) [13]. Additionally, a systematic review including six RCTs evaluating the  
22  
23 480 effectiveness of hypnotherapy to reduce chemotherapy-induced nausea found  
24  
25 481 hypnotherapy was most effective when compared with standard medical care to reduce  
26  
27 482 complaints ( $D=0.99$ ) [14].

27 483

28  
29 484 The present study is the first study to investigate the effectiveness of HT on symptoms of  
30  
31 485 nausea in children and adolescents diagnosed with CIN or FD, according to the Rome IV  
32  
33 486 criteria. If shown effective, it may provide an additional treatment option for children with  
34  
35 487 CIN or FD.

36 488 The study has several strengths. The first strength is that pediatricians from eleven different  
37  
38 489 hospitals throughout the Netherlands will recruit all children and adolescents. The hospitals,  
39  
40 490 both an academic center and teaching hospitals, serve an ethnic and socio-economic diverse  
41  
42 491 population of children and adolescents. This recruitment method has two advantages: first,  
43  
44 492 it may reduce response bias to the intervention. It has previously been reported that  
45  
46 493 patients from primary and secondary level care may have different responses to treatment  
47  
48 494 [38]. All children included in the present study receive secondary level care. The second  
49  
50 495 advantage is that the multicenter design of the study will increase generalizability of the trial  
51  
52 496 outcomes.

53 497 Another strength of the study is the long-term follow up of one year, which allows us to  
54  
55 498 properly compare the potential effectiveness of HT with SMT. It has been known that the  
56  
57 499 severity of functional gastrointestinal symptoms in children varies over time [39] and a  
58  
59 500 continuous improvement in symptoms is often reported in children receiving hypnotherapy  
60  
61 501 [13].

21 November 2019. V2.

1  
2  
3 502 This study also has several limitations. The first limitation is that children, parents,  
4  
5 503 investigators and health care providers are not blinded for the received treatments, which is  
6  
7 504 not possible due the nature of HT. Several solutions will be applied to limit the risk of bias.  
8  
9 505 First, to minimize performance bias, pediatricians and hypnotherapists will follow treatment  
10  
11 506 guidelines to prevent any use of additional or alternative forms of care during the study  
12  
13 507 period that may influence treatment outcomes. Second, to reduce the risk of detection bias,  
14  
15 508 children and adolescents use reliable outcome measures and record symptoms themselves  
16  
17 509 at home. Moreover, children and adolescents record symptoms of nausea for seven  
18  
19 510 consecutive days, which corrects for individual variability of symptoms over time. Third, the  
20  
21 511 endpoints of the study will be preregistered.  
22  
23 512 The second limitation is that the SMT provided by pediatricians in this study may not reflect  
24  
25 513 usual clinical practice. In the present study, children and adolescents receive longer and  
26  
27 514 more intensive medical therapy from their pediatrician compared to the real medical  
28  
29 515 practice situation. However, previous studies indicate that patient-provider interactions can  
30  
31 516 largely influence gastrointestinal treatment outcomes [40]. Therefore, it is important to  
32  
33 517 control for the time spent per patient in the SMT group.  
34  
35 518 If the results of this study show that HT given by a therapist is comparable or slightly more  
36  
37 519 effective than medical treatment provided by pediatricians, HT may become a new  
38  
39 520 treatment strategy to help children with CIN or FD. Furthermore, as HT is presumably less  
40  
41 521 costly than treatments by a specialist it may also decrease health care costs.

#### 42 522 **Abbreviations**

43 523 **APIS:** Abdominal Pain Intensity Subscale; **APFS:** abdominal pain frequency subscale; **CIN:**  
44 524 Chronic Idiopathic Nausea; **CSI:** Children's Somatization Inventory; **FAP:** Functional  
45 525 Abdominal Pain; **FD:** Functional Dyspepsia; **FGID:** Functional Gastrointestinal Disorders; **GI:**  
46 526 gastrointestinal; **HLQ:** Health and Labor Questionnaire; **HT:** Hypnotherapy; **HUI:** Health  
47 527 Utility Index Mark 3; **ITT:** Intention to Treat Analysis; **MEC-U:** Medical Research Ethics  
48 528 Committees United; **NIS:** Nausea Incidence Scale; **NFS:** Nausea Frequency Score; **PPI:** Proton  
49 529 Pump Inhibitors; **QALY:** Quality Adjusted Life Years; **QoL:** Health related Quality of Life;  
50 530 **RCADS-25:** Revised Anxiety and Depression Scale-short version; **RCT:** Randomized Controlled  
51 531 Trial; **REC:** Research Ethical Committees; **SMT:** Standard Medical Care plus supportive  
52 532 therapy; **SON:** Severity Of Nausea; **WMO:** Medical Research Involving Human Subjects Act

21 November 2019. V2.

1  
2  
3 533 **Acknowledgements**

4  
5 534 None

6  
7  
8 535 **Competing interests**

9 536 The authors declare no competing interests.

10  
11  
12 537 **Funding**

13  
14 538 The Christine Bader Foundation and Gastrointestinal and Liver Foundation supported this  
15 539 work. These funding sources had no role in the design of this study. They will not have any  
16 540 role during the collection of data, analyses or submission of the results.

17  
18  
19  
20 541 **Author contributions**

21 542 AV is the principle investigator, designed the study, wrote the protocol, supervised the trial  
22 543 and supervised writing the manuscript. PB provided adjustments to the protocol, drafted the  
23 544 manuscript and coordinated the trial. MB critically revised the protocol, supervised the trial  
24 545 and supervised writing the manuscript. BdH, ES, HvW, WTAT, EK, MG, NB, MW, MvdB, JG,  
25 546 ST, CF participated in patient recruitment and/or treatment, read and approved the  
26 547 manuscript.

27  
28  
29  
30 548 **Trial status**

31 549 Recruitment started in September 2016 and is ongoing. In October 2016, the first participant  
32 550 enrolled. Currently, 92 children are participating in the study (18 of them have completed  
33 551 the study protocol).

34  
35  
36 552 **Ethics approval and consent to participate**

37 553 This RCT was approved by the Medical Research Ethics Committees United (MEC-U) in  
38 554 Nieuwegein, the Netherlands (file number: NL51167.100.15). The study will be conducted in  
39 555 accordance with the Medical Research Involving Human Subjects Act (WMO) and conferring  
40 556 to the principles of the Declaration of Helsinki [36]. (64th WMA General Assembly, Fortaleza,  
41 557 Brazil, October 2013). The study will follow the conduct code concerning resistance in  
42 558 minors who participate in clinical trials as defined by the Dutch Pediatric Society. Informed  
43 559 consent will be asked from parents/guardians of children <12 years of age. In children and  
44 560 adolescents  $\geq 12$  years of age informed consent will be asked from the parents-guardians  
45 561 and the children and adolescents. In the event of amendments of the protocol, relevant

21 November 2019. V2.

562 research ethical committees (RECs) will be informed. Results of the study will be publically  
563 disclosed in a peer-reviewed journal, without any restrictions; both positive as well as  
564 negative results will be published.

565 **5 peer reviewers suggested**

566 Miguel Saps (msaps@childrensmemorial.org), Miranda van Tilburg (Tilburg@med.unc.edu),  
567 Peter Whorwell (peter.whorwell@smuht.nwest.nhs.uk), Olafur Palsson  
568 (opalsson@med.unc.edu), Juliette Rutten (j.m.rutten@amc.uva.nl), Emma Louise Calvert.

569 **Figure legends**

570 **X**

571 **Figure 1.** Standard Protocol Items: Recommendations for Interventional Trials (SPIRIT) Figure  
572 displaying the trial design and the outcome measurements. After screening for eligibility (t-  
573 1), children and parents sign the informed consent form and fill in the baseline questionnaire  
574 (t0). Children are then randomized in the hypnotherapy (HT) or standard medical care (SMT)  
575 group. Assessments take place before the start of treatment (baseline; t0), 6 weeks after the  
576 start of treatment (t1), 3 months after the start of treatment (t2), 6 months follow-up (t3)  
577 and 12 months follow-up (t4).

578  
579 **X**

580 **Figure 2.** The Consolidated Standards of Reporting Trials (CONSORT) flow diagram indicating  
581 the number of participants throughout the study. After eligibility screening, children are  
582 randomized in either the hypnotherapy (HT) or standard medical care (SMT) group. Follow-  
583 up measurements take place at 6 weeks after the start of treatment (t1), 3 months after the  
584 start of treatment (t2), and 6 months follow-up (t3) and 12 months follow-up (t4).

585

586

587

588

589

590

591

592

593

594

595

21 November 2019. V2.

1  
2  
3 1. Robin, S. G., Keller, C., Zwiener, R., et al. Prevalence of pediatric functional gastrointestinal  
4 disorders utilizing the Rome IV criteria. *The Journal of pediatrics* 2018;195:134-139.

5  
6 2. Kovacic, K., Williams, S., Li, et al. High prevalence of nausea in children with pain-  
7 associated functional gastrointestinal disorders: are Rome criteria applicable? *Journal of Pediatric*  
8 *Gastroenterology and Nutrition* 2013;57(3):311–5.

9  
10  
11 3. Perez, M. E., & Youssef, N. N. Dyspepsia in childhood and adolescence: insights and  
12 treatment considerations. *Current Gastroenterology Reports*, 2007;9(6):447–55.

13  
14 4. Russell, A., Sherman, A. L., & Walker, L. S. Nausea Complicating Recurrent Abdominal Pain  
15 in Childhood Predicts Functional GI Disorders, Disability, Depression and Anxiety in Young  
16 Adulthood: Results of a Prospective Cohort Study. *Gastroenterology* 2015; 148:S–122.

17  
18 5. Brook, R. A., Kleinman, N. L., Choung, R. S., et al. Functional Dyspepsia Impacts  
19 Absenteeism and Direct and Indirect Costs. *Clinical Gastroenterology and Hepatology* 2010;8:  
20 498–503  
21  
22

23  
24 596

25  
26 597

27  
28 598

29  
30 599

31  
32 600

33  
34 601

35  
36 602

37  
38 603

39  
40 604

41  
42 605

43  
44 606

45  
46 607

47  
48 608

49  
50 609

51  
52 610

53  
54 611

55 612 **References**

21 November 2019. V2.

- 1  
2  
3 6. Hyams, J. S., Di Lorenzo, C., Saps, et al. Childhood Functional Gastrointestinal Disorders:  
4 Child/Adolescent. *Gastroenterology*, 2016;150:1456–1468.e2.  
5
- 6 7. Madani, S., Cortes, O., & Thomas, R. Cyproheptadine Use in Children With Functional  
7 Gastrointestinal Disorders. *Journal of Pediatric Gastroenterology and Nutrition*, 2016;62: 409–  
8 413.  
9
- 10 8. Rodriguez, L., Diaz, J., & Nurko, S. Safety and Efficacy of Cyproheptadine for Treating  
11 Dyspeptic Symptoms in Children. *The Journal of Pediatrics*, 2013;163:261–267.  
12
- 13 9. Kellow, J. E., Azpiroz, F., Delvaux, M., et al. Applied Principles of Neurogastroenterology:  
14 Physiology/Motility Sensation. *Gastroenterology*, 2006;130(5):1412–1420.  
15 <http://doi.org/10.1053/j.gastro.2005.08.061>  
16
- 17 10. Oudenhove, L. Van, Vandenberghe, J., Geeraerts, B., Vos, R., et al. Determinants of  
18 symptoms in functional dyspepsia: gastric sensorimotor function, psychosocial factors or  
19 somatisation? *Gut* 2008;57:1666-1673  
20
- 21 11. Häuser, W., Hagl, M., Schmierer, A., et al. The Efficacy, Safety and Applications of  
22 Medical Hypnosis. *Deutsches Arzteblatt International*, 2016; 113: 289–96.  
23
- 24 12. Miller, V., Carruthers, H. R., Morris, J., et al. Hypnotherapy for irritable bowel syndrome:  
25 an audit of one thousand adult patients. *Alimentary Pharmacology & Therapeutics*, 2015;41:844–  
26 855  
27
- 28 13. Vlioger, A. M., Menko-Frankenhuis, C., Wolfkamp, S. C. S., et al. Hypnotherapy for  
29 children with functional abdominal pain or irritable bowel syndrome: a randomized controlled  
30 trial. *Gastroenterology*, 2007;133:1430–6  
31
- 32 14. Richardson, J., Smith, J. E., McCall, G., Richardson, A., Hypnosis for nausea and vomiting  
33 in cancer chemotherapy: a systematic review of the research evidence. *Eur J Cancer Care (Engl)*,  
34 2007;16:402–412  
35
- 36 15. Whorwell, P. J., Houghton, L. A., Taylor, E. E., et al. Physiological effects of emotion:  
37 assessment via hypnosis. *Lancet*, 1992;340(8811):69–72.  
38
- 39 16. Gonsalkorale, W. M., Houghton, L. A., & Whorwell, P. J. Hypnotherapy in irritable bowel  
40 syndrome: a large-scale audit of a clinical service with examination of factors influencing  
41 responsiveness. *The American Journal of Gastroenterology*, 2002;97:954–961.  
42 <http://doi.org/10.1111/j.1572-0241.2002.05615.x>  
43
- 44 17. Lea, R., Houghton, L. A., Calvert, E. L., et al. Gut-focused hypnotherapy normalizes  
45 disordered rectal sensitivity in patients with irritable bowel syndrome. *Alimentary Pharmacology  
46 & Therapeutics*, 2003;17:635–42.  
47
- 48 18. Lowén, M. B. O., Mayer, E. A., Sjöberg, et al. Effect of hypnotherapy and educational  
49 intervention on brain response to visceral stimulus in the irritable bowel syndrome. *Alimentary  
50 Pharmacology & Therapeutics*, 2013;37:1184–1197.  
51  
52  
53  
54  
55  
56  
57  
58  
59  
60

21 November 2019. V2.

1  
2  
3 19. Prior, A., Colgan, S. M., & Whorwell, P. J. Changes in rectal sensitivity after hypnotherapy  
4 in patients with irritable bowel syndrome. *Gut*, 1990;31:896–8

5  
6 20. Rutten, J. M. T. M., Vlieger, A. M., Frankenhuis, C., et al. Home-Based Hypnotherapy Self-  
7 exercises vs Individual Hypnotherapy With a Therapist for Treatment of Pediatric Irritable Bowel  
8 Syndrome, Functional Abdominal Pain, or Functional Abdominal Pain Syndrome. *JAMA Pediatrics*,  
9 2017;171;470.

10  
11 21. Rutten, J. M., Vlieger, A. M., Frankenhuis, C., et al. Gut-directed hypnotherapy in  
12 children with irritable bowel syndrome or functional abdominal pain (syndrome): a randomized  
13 controlled trial on self exercises at home using CD versus individual therapy by qualified  
14 therapists. *BMC Pediatrics*, 2014;14(1):140

15  
16 22. Vlieger, A. M., Rutten, J. M. T. M., Govers, A. M. A. P., et al. Long-term follow-up of gut-  
17 directed hypnotherapy vs. standard care in children with functional abdominal pain or irritable  
18 bowel syndrome. *The American Journal of Gastroenterology*, 2012;107(4):627–31.

19  
20 23. Baxter, A. L., Watcha, M. F., Baxter, W. V. et al. Development and validation of a pictorial  
21 nausea rating scale for children. *Pediatrics*, 2011;127:e1542–9.

22  
23 24. Canan, O., Ozcay, F., Ozbay-Hosnut, F., et al. Value of the Likert dyspepsia scale in  
24 differentiation of functional and organic dyspepsia in children. *Journal of Pediatric*  
25 *Gastroenterology and Nutrition*, 2011;52:392–8

26  
27 25. De Luca, L., Zagari, R. M., Pozzato, P., et al. Measuring dyspepsia: a new severity index  
28 validated in Bologna. *Digestive and Liver Disease*, 2004;36: 806–810.

29  
30 26. Ravens-Sieberer, U., Gosch, A., Rajmil, L., et al. KIDSCREEN Group. The KIDSCREEN-52  
31 Quality of Life Measure for Children and Adolescents: Psychometric Results from a Cross-Cultural  
32 Survey in 13 European Countries. *Value in Health*, 2008;11:645–658.

33  
34 27. Ravens-Sieberer, U., Auquier, P., Erhart, M., et al. The KIDSCREEN-27 quality of life  
35 measure for children and adolescents: psychometric results from a cross-cultural survey in 13  
36 European countries. *Quality of Life Research*, 2007;16:1347-1356.

37  
38 28. Muris, P., Meesters, C., & Schouten, E. A brief questionnaire of DSM-IV-defined anxiety  
39 and depression symptoms among children. *Clinical Psychology & Psychotherapy*, 2002;9:430–442

40  
41 29. Eiser, C., & Morse, R. The measurement of quality of life in children: past and future  
42 perspectives. *Journal of Developmental and Behavioral Pediatrics : JDBP*, 2001; 22: 248–56

43  
44 30. Feeny, D., Furlong, W., Torrance, G. W., et al. Multiattribute and single-attribute utility  
45 functions for the health utilities index mark 3 system. *Medical Care*, 2002;40:113–28



21 November 2019. V2.

1  
2  
3  
4 31. Tarride, J.-E., Burke, N., Bischof, M., et al. A review of health utilities across conditions  
5 common in paediatric and adult populations. *Health and Quality of Life Outcomes*, 2010;8:12.

6  
7  
8 32. Van Roijen, L., Essink-bot, M.-L., Koopmanschap, M. A., et al. Labor and Health Status in  
9 Economic Evaluation of Health Care: The Health and Labor Questionnaire. *International Journal*  
10 *of Technology Assessment in Health Care*, 1996;12:405–415.

11  
12 33. Meesters, C., Muris, P., Ghys, A., et al. The Children's Somatization Inventory: further  
13 evidence for its reliability and validity in a pediatric and a community sample of Dutch children  
14 and adolescents. *Journal of Pediatric Psychology*, 2003;28:413–22.

15  
16  
17 34. Mangel, A., Hahn, B., Heath, A., Northcutt, A., et al. Adequate Relief as an Endpoint in  
18 Clinical Trials in Irritable Bowel Syndrome. *Journal of International Medical Research*,  
19 1998;26:76–81.

20  
21  
22 35. Calvert, E. L., Houghton, L. A., Cooper, P., et al. Long-term improvement in functional  
23 dyspepsia using hypnotherapy. *Gastroenterology*, 2002;123:1778–1785.

24  
25 36. World Medical Association. World Medical Association Declaration of Helsinki. Ethical  
26 principles for medical research involving human subjects. *Bulletin of the World Health*  
27 *Organization*, 2001;79:373.

28  
29  
30 37. Browne, P. D., Nagelkerke, S. C. J., van Etten-Jamaludin, et al. Pharmacological  
31 treatments for functional nausea and functional dyspepsia in children: a systematic review. 2018  
32 *Expert Review of Clinical Pharmacology*, (in press)

33  
34  
35 38. Veldhuyzen van Zanten, S. J., Talley, N. J., Bytzer, P., et al. Design of treatment trials for  
36 functional gastrointestinal disorders. *Gut*, 1999;45:69–77.

37  
38  
39 39. Miele, E., Simeone, D., Marino, A., et al. Functional gastrointestinal disorders in children: an  
40 Italian prospective survey. *Pediatrics*, 2004;114:73-78

41  
42  
43 40. Dossett, M. L., Mu, L., Davis, R. B., et al. Patient-Provider Interactions Affect Symptoms in  
44 Gastroesophageal Reflux Disease: A Pilot Randomized, Double-Blind, Placebo-Controlled Trial.  
45 *PLOS ONE*, 2015;10:e0136855

46  
47  
48  
49 613

1  
2  
3  
4  
5  
6  
7  
8  
9  
10  
11  
12  
13  
14  
15  
16  
17  
18  
19  
20  
21  
22  
23  
24  
25  
26  
27  
28  
29  
30  
31  
32  
33  
34  
35  
36  
37  
38  
39  
40  
41  
42  
43  
44  
45  
46  
47  
48  
49  
50  
51  
52  
53  
54  
55  
56  
57  
58  
59  
60

| TIMEPOINT                                                      | Enrolment              | Allocation              | During treatment                          |                                            | Follow-up               |                          |
|----------------------------------------------------------------|------------------------|-------------------------|-------------------------------------------|--------------------------------------------|-------------------------|--------------------------|
|                                                                | Before treatment (t-1) | Start of treatment (t0) | 6 weeks after the start of treatment (t1) | 3 months after the start of treatment (t2) | 6 months follow-up (t3) | 12 months follow-up (t4) |
| <b>ENROLMENT:</b>                                              |                        |                         |                                           |                                            |                         |                          |
| Eligibility screen                                             | X                      |                         |                                           |                                            |                         |                          |
| Informed consent                                               | X                      |                         |                                           |                                            |                         |                          |
| Randomization                                                  | X                      |                         |                                           |                                            |                         |                          |
| <b>INTERVENTIONS:</b>                                          |                        |                         |                                           |                                            |                         |                          |
| Hypnotherapy group (HT)                                        |                        | ←————→                  |                                           |                                            |                         |                          |
| Standard medical care group (SMT)                              |                        | ←————→                  |                                           |                                            |                         |                          |
| <b>ASSESSMENTS:</b>                                            |                        |                         |                                           |                                            |                         |                          |
| Nausea and abdominal pain                                      | X                      |                         | X                                         | X                                          | X                       | X                        |
| Dyspeptic symptoms                                             |                        | X                       |                                           | X                                          | X                       | X                        |
| Health related quality of life                                 |                        | X                       |                                           | X                                          | X                       | X                        |
| Anxiety and Depression                                         |                        | X                       |                                           | X                                          | X                       | X                        |
| Cost effectiveness/cost utility                                |                        | X                       |                                           | X                                          | X                       | X                        |
| Work absenteeism by parents and school absenteeism by children |                        | X                       |                                           | X                                          | X                       | X                        |
| Somatization                                                   |                        | X                       |                                           | X                                          | X                       | X                        |
| Adequate relief                                                |                        |                         |                                           |                                            | X                       | X                        |

Figure 1. Standard Protocol Items: Recommendations for Interventional Trials (SPIRIT) Figure displaying the trial design and the outcome measurements. After screening for eligibility (t-1), children and parents sign the informed consent form and fill in the baseline questionnaire (t0). Children are then randomized in the hypnotherapy (HT) or standard medical care (SMT) group. Assessments take place before the start of treatment (baseline; t0), 6 weeks after the start of treatment (t1), 3 months after the start of treatment (t2), 6 months follow-up (t3) and 12 months follow-up (t4).

215x279mm (300 x 300 DPI)



45 Figure 2. The Consolidated Standards of Reporting Trials (CONSORT) flow diagram indicating the number of  
46 participants throughout the study. After eligibility screening, children are randomized in either the  
47 hypnotherapy (HT) or standard medical care (SMT) group. Follow-up measurements take place at 6 weeks  
48 after the start of treatment (t<sub>1</sub>), 3 months after the start of treatment (t<sub>2</sub>), and 6 months follow-up (t<sub>3</sub>) and  
49 12 months follow-up (t<sub>4</sub>).

50 215x279mm (300 x 300 DPI)

# Reporting checklist for protocol of a clinical trial.

Based on the SPIRIT guidelines.

## Instructions to authors

Complete this checklist by entering the page numbers from your manuscript where readers will find each of the items listed below.

Your article may not currently address all the items on the checklist. Please modify your text to include the missing information. If you are certain that an item does not apply, please write "n/a" and provide a short explanation.

Upload your completed checklist as an extra file when you submit to a journal.

In your methods section, say that you used the SPIRIT reporting guidelines, and cite them as:

Chan A-W, Tetzlaff JM, Altman DG, Laupacis A, Gøtzsche PC, Krleža-Jerić K, Hróbjartsson A, Mann H, Dickersin K, Berlin J, Doré C, Parulekar W, Summerskill W, Groves T, Schulz K, Sox H, Rockhold FW, Rennie D, Moher D. SPIRIT 2013 Statement: Defining standard protocol items for clinical trials. *Ann Intern Med.* 2013;158(3):200-207

|                                             |     | Reporting Item                                                                                               | Page Number |
|---------------------------------------------|-----|--------------------------------------------------------------------------------------------------------------|-------------|
| Title                                       | #1  | Descriptive title identifying the study design, population, interventions, and, if applicable, trial acronym | 1           |
| Trial registration                          | #2a | Trial identifier and registry name. If not yet registered, name of intended registry                         | 2           |
| Trial registration: data set                | #2b | All items from the World Health Organization Trial Registration Data Set                                     | 3-14        |
| Protocol version                            | #3  | Date and version identifier                                                                                  | 1           |
| Funding                                     | #4  | Sources and types of financial, material, and other support                                                  | 18          |
| Roles and responsibilities: contributorship | #5a | Names, affiliations, and roles of protocol contributors                                                      | 1, 18       |
| Roles and                                   | #5b | Name and contact information for the trial sponsor                                                           | 18          |

|    |                      |      |                                                                   |      |
|----|----------------------|------|-------------------------------------------------------------------|------|
| 1  | responsibilities:    |      |                                                                   |      |
| 2  | sponsor contact      |      |                                                                   |      |
| 3  | information          |      |                                                                   |      |
| 4  |                      |      |                                                                   |      |
| 5  |                      |      |                                                                   |      |
| 6  | Roles and            | #5c  | Role of study sponsor and funders, if any, in study design;       | 18   |
| 7  | responsibilities:    |      | collection, management, analysis, and interpretation of           |      |
| 8  | sponsor and funder   |      | data; writing of the report; and the decision to submit the       |      |
| 9  |                      |      | report for publication, including whether they will have          |      |
| 10 |                      |      | ultimate authority over any of these activities                   |      |
| 11 |                      |      |                                                                   |      |
| 12 |                      |      |                                                                   |      |
| 13 |                      |      |                                                                   |      |
| 14 | Roles and            | #5d  | Composition, roles, and responsibilities of the coordinating      | NA   |
| 15 | responsibilities:    |      | centre, steering committee, endpoint adjudication                 |      |
| 16 | committees           |      | committee, data management team, and other individuals or         |      |
| 17 |                      |      | groups overseeing the trial, if applicable (see Item 21a for      |      |
| 18 |                      |      | data monitoring committee)                                        |      |
| 19 |                      |      |                                                                   |      |
| 20 |                      |      |                                                                   |      |
| 21 |                      |      |                                                                   |      |
| 22 |                      |      |                                                                   |      |
| 23 | Background and       | #6a  | Description of research question and justification for            | 3, 4 |
| 24 | rationale            |      | undertaking the trial, including summary of relevant studies      |      |
| 25 |                      |      | (published and unpublished) examining benefits and harms          |      |
| 26 |                      |      | for each intervention                                             |      |
| 27 |                      |      |                                                                   |      |
| 28 |                      |      |                                                                   |      |
| 29 |                      |      |                                                                   |      |
| 30 | Background and       | #6b  | Explanation for choice of comparators                             | 5    |
| 31 | rationale: choice of |      |                                                                   |      |
| 32 | comparators          |      |                                                                   |      |
| 33 |                      |      |                                                                   |      |
| 34 |                      |      |                                                                   |      |
| 35 | Objectives           | #7   | Specific objectives or hypotheses                                 | 4    |
| 36 |                      |      |                                                                   |      |
| 37 |                      |      |                                                                   |      |
| 38 | Trial design         | #8   | Description of trial design including type of trial (eg, parallel | 5    |
| 39 |                      |      | group, crossover, factorial, single group), allocation ratio,     |      |
| 40 |                      |      | and framework (eg, superiority, equivalence, non-inferiority,     |      |
| 41 |                      |      | exploratory)                                                      |      |
| 42 |                      |      |                                                                   |      |
| 43 |                      |      |                                                                   |      |
| 44 |                      |      |                                                                   |      |
| 45 | Study setting        | #9   | Description of study settings (eg, community clinic,              | 5    |
| 46 |                      |      | academic hospital) and list of countries where data will be       |      |
| 47 |                      |      | collected. Reference to where list of study sites can be          |      |
| 48 |                      |      | obtained                                                          |      |
| 49 |                      |      |                                                                   |      |
| 50 |                      |      |                                                                   |      |
| 51 |                      |      |                                                                   |      |
| 52 | Eligibility criteria | #10  | Inclusion and exclusion criteria for participants. If applicable, | 6    |
| 53 |                      |      | eligibility criteria for study centres and individuals who will   |      |
| 54 |                      |      | perform the interventions (eg, surgeons, psychotherapists)        |      |
| 55 |                      |      |                                                                   |      |
| 56 |                      |      |                                                                   |      |
| 57 |                      |      |                                                                   |      |
| 58 | Interventions:       | #11a | Interventions for each group with sufficient detail to allow      | 7-9  |
| 59 |                      |      |                                                                   |      |
| 60 |                      |      |                                                                   |      |

|    |                      |      |                                                                                                                                                                                                                                                                                                                                                                                |       |
|----|----------------------|------|--------------------------------------------------------------------------------------------------------------------------------------------------------------------------------------------------------------------------------------------------------------------------------------------------------------------------------------------------------------------------------|-------|
| 1  | description          |      | replication, including how and when they will be administered                                                                                                                                                                                                                                                                                                                  |       |
| 2  |                      |      |                                                                                                                                                                                                                                                                                                                                                                                |       |
| 3  |                      |      |                                                                                                                                                                                                                                                                                                                                                                                |       |
| 4  | Interventions:       | #11b | Criteria for discontinuing or modifying allocated interventions for a given trial participant (eg, drug dose change in response to harms, participant request, or improving / worsening disease)                                                                                                                                                                               | 9, 15 |
| 5  | modifications        |      |                                                                                                                                                                                                                                                                                                                                                                                |       |
| 6  |                      |      |                                                                                                                                                                                                                                                                                                                                                                                |       |
| 7  |                      |      |                                                                                                                                                                                                                                                                                                                                                                                |       |
| 8  |                      |      |                                                                                                                                                                                                                                                                                                                                                                                |       |
| 9  |                      |      |                                                                                                                                                                                                                                                                                                                                                                                |       |
| 10 |                      |      |                                                                                                                                                                                                                                                                                                                                                                                |       |
| 11 | Interventions:       | #11c | Strategies to improve adherence to intervention protocols, and any procedures for monitoring adherence (eg, drug tablet return; laboratory tests)                                                                                                                                                                                                                              | 9     |
| 12 | adherence            |      |                                                                                                                                                                                                                                                                                                                                                                                |       |
| 13 |                      |      |                                                                                                                                                                                                                                                                                                                                                                                |       |
| 14 |                      |      |                                                                                                                                                                                                                                                                                                                                                                                |       |
| 15 |                      |      |                                                                                                                                                                                                                                                                                                                                                                                |       |
| 16 |                      |      |                                                                                                                                                                                                                                                                                                                                                                                |       |
| 17 | Interventions:       | #11d | Relevant concomitant care and interventions that are permitted or prohibited during the trial                                                                                                                                                                                                                                                                                  | 9     |
| 18 | concomitant care     |      |                                                                                                                                                                                                                                                                                                                                                                                |       |
| 19 |                      |      |                                                                                                                                                                                                                                                                                                                                                                                |       |
| 20 |                      |      |                                                                                                                                                                                                                                                                                                                                                                                |       |
| 21 | Outcomes             | #12  | Primary, secondary, and other outcomes, including the specific measurement variable (eg, systolic blood pressure), analysis metric (eg, change from baseline, final value, time to event), method of aggregation (eg, median, proportion), and time point for each outcome. Explanation of the clinical relevance of chosen efficacy and harm outcomes is strongly recommended | 9-13  |
| 22 |                      |      |                                                                                                                                                                                                                                                                                                                                                                                |       |
| 23 |                      |      |                                                                                                                                                                                                                                                                                                                                                                                |       |
| 24 |                      |      |                                                                                                                                                                                                                                                                                                                                                                                |       |
| 25 |                      |      |                                                                                                                                                                                                                                                                                                                                                                                |       |
| 26 |                      |      |                                                                                                                                                                                                                                                                                                                                                                                |       |
| 27 |                      |      |                                                                                                                                                                                                                                                                                                                                                                                |       |
| 28 |                      |      |                                                                                                                                                                                                                                                                                                                                                                                |       |
| 29 |                      |      |                                                                                                                                                                                                                                                                                                                                                                                |       |
| 30 |                      |      |                                                                                                                                                                                                                                                                                                                                                                                |       |
| 31 |                      |      |                                                                                                                                                                                                                                                                                                                                                                                |       |
| 32 | Participant timeline | #13  | Time schedule of enrolment, interventions (including any run-ins and washouts), assessments, and visits for participants. A schematic diagram is highly recommended (see Figure)                                                                                                                                                                                               | 5     |
| 33 |                      |      |                                                                                                                                                                                                                                                                                                                                                                                |       |
| 34 |                      |      |                                                                                                                                                                                                                                                                                                                                                                                |       |
| 35 |                      |      |                                                                                                                                                                                                                                                                                                                                                                                |       |
| 36 |                      |      |                                                                                                                                                                                                                                                                                                                                                                                |       |
| 37 |                      |      |                                                                                                                                                                                                                                                                                                                                                                                |       |
| 38 |                      |      |                                                                                                                                                                                                                                                                                                                                                                                |       |
| 39 |                      |      |                                                                                                                                                                                                                                                                                                                                                                                |       |
| 40 | Sample size          | #14  | Estimated number of participants needed to achieve study objectives and how it was determined, including clinical and statistical assumptions supporting any sample size calculations                                                                                                                                                                                          | 13-14 |
| 41 |                      |      |                                                                                                                                                                                                                                                                                                                                                                                |       |
| 42 |                      |      |                                                                                                                                                                                                                                                                                                                                                                                |       |
| 43 |                      |      |                                                                                                                                                                                                                                                                                                                                                                                |       |
| 44 |                      |      |                                                                                                                                                                                                                                                                                                                                                                                |       |
| 45 |                      |      |                                                                                                                                                                                                                                                                                                                                                                                |       |
| 46 |                      |      |                                                                                                                                                                                                                                                                                                                                                                                |       |
| 47 | Recruitment          | #15  | Strategies for achieving adequate participant enrolment to reach target sample size                                                                                                                                                                                                                                                                                            | 5     |
| 48 |                      |      |                                                                                                                                                                                                                                                                                                                                                                                |       |
| 49 |                      |      |                                                                                                                                                                                                                                                                                                                                                                                |       |
| 50 |                      |      |                                                                                                                                                                                                                                                                                                                                                                                |       |
| 51 | Allocation: sequence | #16a | Method of generating the allocation sequence (eg, computer-generated random numbers), and list of any factors for stratification. To reduce predictability of a random sequence, details of any planned restriction (eg, blocking) should be provided in a separate document that is unavailable to those who enrol participants or assign                                     | 6-7   |
| 52 | generation           |      |                                                                                                                                                                                                                                                                                                                                                                                |       |
| 53 |                      |      |                                                                                                                                                                                                                                                                                                                                                                                |       |
| 54 |                      |      |                                                                                                                                                                                                                                                                                                                                                                                |       |
| 55 |                      |      |                                                                                                                                                                                                                                                                                                                                                                                |       |
| 56 |                      |      |                                                                                                                                                                                                                                                                                                                                                                                |       |
| 57 |                      |      |                                                                                                                                                                                                                                                                                                                                                                                |       |
| 58 |                      |      |                                                                                                                                                                                                                                                                                                                                                                                |       |
| 59 |                      |      |                                                                                                                                                                                                                                                                                                                                                                                |       |
| 60 |                      |      |                                                                                                                                                                                                                                                                                                                                                                                |       |

|    |                       |      |                                                                |       |
|----|-----------------------|------|----------------------------------------------------------------|-------|
| 1  |                       |      | interventions                                                  |       |
| 2  |                       |      |                                                                |       |
| 3  | Allocation            | #16b | Mechanism of implementing the allocation sequence (eg,         | 6-7   |
| 4  | concealment           |      | central telephone; sequentially numbered, opaque, sealed       |       |
| 5  | mechanism             |      | envelopes), describing any steps to conceal the sequence       |       |
| 6  |                       |      | until interventions are assigned                               |       |
| 7  |                       |      |                                                                |       |
| 8  |                       |      |                                                                |       |
| 9  |                       |      |                                                                |       |
| 10 | Allocation:           | #16c | Who will generate the allocation sequence, who will enrol      | 6-7   |
| 11 | implementation        |      | participants, and who will assign participants to              |       |
| 12 |                       |      | interventions                                                  |       |
| 13 |                       |      |                                                                |       |
| 14 |                       |      |                                                                |       |
| 15 | Blinding (masking)    | #17a | Who will be blinded after assignment to interventions (eg,     | 6-7   |
| 16 |                       |      | trial participants, care providers, outcome assessors, data    |       |
| 17 |                       |      | analysts), and how                                             |       |
| 18 |                       |      |                                                                |       |
| 19 |                       |      |                                                                |       |
| 20 |                       |      |                                                                |       |
| 21 | Blinding (masking):   | #17b | If blinded, circumstances under which unblinding is            | NA    |
| 22 | emergency             |      | permissible, and procedure for revealing a participant's       |       |
| 23 | unblinding            |      | allocated intervention during the trial                        |       |
| 24 |                       |      |                                                                |       |
| 25 |                       |      |                                                                |       |
| 26 | Data collection plan  | #18a | Plans for assessment and collection of outcome, baseline,      | 9-13  |
| 27 |                       |      | and other trial data, including any related processes to       |       |
| 28 |                       |      | promote data quality (eg, duplicate measurements, training     |       |
| 29 |                       |      | of assessors) and a description of study instruments (eg,      |       |
| 30 |                       |      | questionnaires, laboratory tests) along with their reliability |       |
| 31 |                       |      | and validity, if known. Reference to where data collection     |       |
| 32 |                       |      | forms can be found, if not in the protocol                     |       |
| 33 |                       |      |                                                                |       |
| 34 |                       |      |                                                                |       |
| 35 |                       |      |                                                                |       |
| 36 |                       |      |                                                                |       |
| 37 |                       |      |                                                                |       |
| 38 | Data collection plan: | #18b | Plans to promote participant retention and complete follow-    | 9     |
| 39 | retention             |      | up, including list of any outcome data to be collected for     |       |
| 40 |                       |      | participants who discontinue or deviate from intervention      |       |
| 41 |                       |      | protocols                                                      |       |
| 42 |                       |      |                                                                |       |
| 43 |                       |      |                                                                |       |
| 44 |                       |      |                                                                |       |
| 45 | Data management       | #19  | Plans for data entry, coding, security, and storage, including | 15    |
| 46 |                       |      | any related processes to promote data quality (eg, double      |       |
| 47 |                       |      | data entry; range checks for data values). Reference to        |       |
| 48 |                       |      | where details of data management procedures can be             |       |
| 49 |                       |      | found, if not in the protocol                                  |       |
| 50 |                       |      |                                                                |       |
| 51 |                       |      |                                                                |       |
| 52 |                       |      |                                                                |       |
| 53 |                       |      |                                                                |       |
| 54 | Statistics: outcomes  | #20a | Statistical methods for analysing primary and secondary        | 14-15 |
| 55 |                       |      | outcomes. Reference to where other details of the statistical  |       |
| 56 |                       |      | analysis plan can be found, if not in the protocol             |       |
| 57 |                       |      |                                                                |       |
| 58 |                       |      |                                                                |       |
| 59 |                       |      |                                                                |       |
| 60 |                       |      |                                                                |       |

|    |                        |      |                                                                  |    |
|----|------------------------|------|------------------------------------------------------------------|----|
| 1  | Statistics: additional | #20b | Methods for any additional analyses (eg, subgroup and            | NA |
| 2  | analyses               |      | adjusted analyses)                                               |    |
| 3  |                        |      |                                                                  |    |
| 4  |                        |      |                                                                  |    |
| 5  | Statistics: analysis   | #20c | Definition of analysis population relating to protocol non-      | 14 |
| 6  | population and         |      | adherence (eg, as randomised analysis), and any statistical      |    |
| 7  | missing data           |      | methods to handle missing data (eg, multiple imputation)         |    |
| 8  |                        |      |                                                                  |    |
| 9  |                        |      |                                                                  |    |
| 10 | Data monitoring:       | #21a | Composition of data monitoring committee (DMC); summary          | 15 |
| 11 | formal committee       |      | of its role and reporting structure; statement of whether it is  |    |
| 12 |                        |      | independent from the sponsor and competing interests; and        |    |
| 13 |                        |      | reference to where further details about its charter can be      |    |
| 14 |                        |      | found, if not in the protocol. Alternatively, an explanation of  |    |
| 15 |                        |      | why a DMC is not needed                                          |    |
| 16 |                        |      |                                                                  |    |
| 17 |                        |      |                                                                  |    |
| 18 |                        |      |                                                                  |    |
| 19 |                        |      |                                                                  |    |
| 20 | Data monitoring:       | #21b | Description of any interim analyses and stopping guidelines,     | NA |
| 21 | interim analysis       |      | including who will have access to these interim results and      |    |
| 22 |                        |      | make the final decision to terminate the trial                   |    |
| 23 |                        |      |                                                                  |    |
| 24 |                        |      |                                                                  |    |
| 25 |                        |      |                                                                  |    |
| 26 | Harms                  | #22  | Plans for collecting, assessing, reporting, and managing         | 15 |
| 27 |                        |      | solicited and spontaneously reported adverse events and          |    |
| 28 |                        |      | other unintended effects of trial interventions or trial conduct |    |
| 29 |                        |      |                                                                  |    |
| 30 |                        |      |                                                                  |    |
| 31 |                        |      |                                                                  |    |
| 32 | Auditing               | #23  | Frequency and procedures for auditing trial conduct, if any,     | 15 |
| 33 |                        |      | and whether the process will be independent from                 |    |
| 34 |                        |      | investigators and the sponsor                                    |    |
| 35 |                        |      |                                                                  |    |
| 36 |                        |      |                                                                  |    |
| 37 | Research ethics        | #24  | Plans for seeking research ethics committee / institutional      | P1 |
| 38 | approval               |      | review board (REC / IRB) approval                                |    |
| 39 |                        |      |                                                                  |    |
| 40 |                        |      |                                                                  |    |
| 41 | Protocol               | #25  | Plans for communicating important protocol modifications         | 14 |
| 42 | amendments             |      | (eg, changes to eligibility criteria, outcomes, analyses) to     |    |
| 43 |                        |      | relevant parties (eg, investigators, REC / IRBs, trial           |    |
| 44 |                        |      | participants, trial registries, journals, regulators)            |    |
| 45 |                        |      |                                                                  |    |
| 46 |                        |      |                                                                  |    |
| 47 |                        |      |                                                                  |    |
| 48 | Consent or assent      | #26a | Who will obtain informed consent or assent from potential        | 19 |
| 49 |                        |      | trial participants or authorised surrogates, and how (see        |    |
| 50 |                        |      | Item 32)                                                         |    |
| 51 |                        |      |                                                                  |    |
| 52 |                        |      |                                                                  |    |
| 53 |                        |      |                                                                  |    |
| 54 | Consent or assent:     | #26b | Additional consent provisions for collection and use of          | NA |
| 55 | ancillary studies      |      | participant data and biological specimens in ancillary           |    |
| 56 |                        |      | studies, if applicable                                           |    |
| 57 |                        |      |                                                                  |    |
| 58 |                        |      |                                                                  |    |
| 59 |                        |      |                                                                  |    |
| 60 |                        |      |                                                                  |    |



|    |                       |      |                                                                 |    |
|----|-----------------------|------|-----------------------------------------------------------------|----|
| 1  | Confidentiality       | #27  | How personal information about potential and enrolled           | 15 |
| 2  |                       |      | participants will be collected, shared, and maintained in       |    |
| 3  |                       |      | order to protect confidentiality before, during, and after the  |    |
| 4  |                       |      | trial                                                           |    |
| 5  |                       |      |                                                                 |    |
| 6  |                       |      |                                                                 |    |
| 7  |                       |      |                                                                 |    |
| 8  | Declaration of        | #28  | Financial and other competing interests for principal           | 18 |
| 9  | interests             |      | investigators for the overall trial and each study site         |    |
| 10 |                       |      |                                                                 |    |
| 11 |                       |      |                                                                 |    |
| 12 | Data access           | #29  | Statement of who will have access to the final trial dataset,   | 15 |
| 13 |                       |      | and disclosure of contractual agreements that limit such        |    |
| 14 |                       |      | access for investigators                                        |    |
| 15 |                       |      |                                                                 |    |
| 16 |                       |      |                                                                 |    |
| 17 | Ancillary and post    | #30  | Provisions, if any, for ancillary and post-trial care, and for  | 15 |
| 18 | trial care            |      | compensation to those who suffer harm from trial                |    |
| 19 |                       |      | participation                                                   |    |
| 20 |                       |      |                                                                 |    |
| 21 |                       |      |                                                                 |    |
| 22 |                       |      |                                                                 |    |
| 23 | Dissemination policy: | #31a | Plans for investigators and sponsor to communicate trial        | 16 |
| 24 | trial results         |      | results to participants, healthcare professionals, the public,  |    |
| 25 |                       |      | and other relevant groups (eg, via publication, reporting in    |    |
| 26 |                       |      | results databases, or other data sharing arrangements),         |    |
| 27 |                       |      | including any publication restrictions                          |    |
| 28 |                       |      |                                                                 |    |
| 29 |                       |      |                                                                 |    |
| 30 |                       |      |                                                                 |    |
| 31 |                       |      |                                                                 |    |
| 32 | Dissemination policy: | #31b | Authorship eligibility guidelines and any intended use of       | NA |
| 33 | authorship            |      | professional writers                                            |    |
| 34 |                       |      |                                                                 |    |
| 35 |                       |      |                                                                 |    |
| 36 | Dissemination policy: | #31c | Plans, if any, for granting public access to the full protocol, | NA |
| 37 | reproducible          |      | participant-level dataset, and statistical code                 |    |
| 38 | research              |      |                                                                 |    |
| 39 |                       |      |                                                                 |    |
| 40 |                       |      |                                                                 |    |
| 41 | Informed consent      | #32  | Model consent form and other related documentation given        | NA |
| 42 | materials             |      | to participants and authorised surrogates                       |    |
| 43 |                       |      |                                                                 |    |
| 44 |                       |      |                                                                 |    |
| 45 | Biological specimens  | #33  | Plans for collection, laboratory evaluation, and storage of     | NA |
| 46 |                       |      | biological specimens for genetic or molecular analysis in the   |    |
| 47 |                       |      | current trial and for future use in ancillary studies, if       |    |
| 48 |                       |      | applicable                                                      |    |
| 49 |                       |      |                                                                 |    |
| 50 |                       |      |                                                                 |    |
| 51 |                       |      |                                                                 |    |

52 The SPIRIT checklist is distributed under the terms of the Creative Commons Attribution License CC-  
 53 BY-ND 3.0. This checklist was completed on 19. June 2018 using <http://www.goodreports.org/>, a tool  
 54 made by the [EQUATOR Network](#) in collaboration with [Penelope.ai](#)  
 55  
 56  
 57  
 58  
 59  
 60
